# Supplementary material for: Prioritizing Colombian plant genetic resources for investment in research using indicators about the geographic origin, vulnerability status, economic benefits, and food security importance
Source: Biodivers Conserv. 2023 May 19;32(7):2221–61. doi: 10.1007/s10531-023-02599-7 (PMC10195663; doi:10.1007/s10531-023-02599-7)
Supplement: Supplementary file 1 — Supplementary file1 (XLSX 43 KB) [file 10531_2023_2599_MOESM1_ESM.xlsx]

## Sheet: Hoja1
nombre_cientifico	categoria	origen_x_regiones	grupo	clasificacion_FAO	cultivo	origen_et	vulnerabilidad_et	imp_economica_et	seg_alimentaria_et
Dovyalis hebecarpa	BGV List	South Asia	Frutales	Fruits and nuts	Frutales menores	Distant	NotEvaluated	Undetermined	Undetermined
Allium cepa	BGV List	Central Asia	Hortalizas	Vegetables and melons	Cebolla	Distant	MinorConcern	Medium	Medium
Allium fistulosum	BGV List	Central Asia	Hortalizas	Vegetables and melons	Cebolla larga	Distant	NotEvaluated	High	Low
Allium sativum	BGV List	Central Asia	Hortalizas	Vegetables and melons	Ajo	Distant	NotEvaluated	Medium	Medium
Anacardium occidentale	BGV List	Tropical South America	Frutales	Fruits and nuts	Marañon	Local	NotEvaluated	Low	Low
Ananas comosus	BGV List	Tropical South America	Frutales	Fruits and nuts	Piña	Local	MinorConcern	High	High
Annona cherimola	BGV List	Tropical South America	Frutales	Fruits and nuts	Anonas	Local	MinorConcern	Low	Low
Annona glabra	BGV List	North America	Frutales	Fruits and nuts	Anonas	Distant	MinorConcern	Medium	Medium
Annona muricata	BGV List	Tropical South America	Frutales	Fruits and nuts	Anonas	Local	MinorConcern	Medium	Medium
Annona purpurea	BGV List	Central America y Mexico	Frutales	Fruits and nuts	Anonas	Close	MinorConcern	Medium	Medium
Annona squamosa	BGV List	Tropical South America	Frutales	Fruits and nuts	Anonas	Local	NotEvaluated	Low	Medium
Arachis hypogaea	BGV List	Tropical South America	Leguminosas	Leguminous crops	Maní	Local	NotEvaluated	Low	Undetermined
Arracacia xanthorrhiza	BGV List	Andes	Tuberculos	Root/tuber crops with high starch or inulin conten	Arracacha	Local	NotEvaluated	Medium	Medium
Artocarpus altilis	BGV List	South Asia	Frutales	Fruits and nuts	Frutales menores	Distant	NotEvaluated	Low	Undetermined
Artocarpus heterophyllus	BGV List	Southeast Asia	Frutales	Fruits and nuts	Frutales menores	Distant	NotEvaluated	Undetermined	Medium
Avena sativa	BGV List	Northwest Europe	Cereales	Cereals	Avena	Distant	MinorConcern	Low	Medium
Averrhoa carambola	BGV List	Southeast Asia	Frutales	Fruits and nuts	Frutales menores	Distant	NotEvaluated	Undetermined	Low
Bactris gasipaes	BGV List	Tropical South America	Frutales	Fruits and nuts	Chontaduro	Local	Threatened	Medium	Medium
Bixa orellana	BGV List	Tropical South America	Plantas aromaticas condimentarias y medicinales	Beverage and spice crops	Frutales amazónicos	Local	NotEvaluated	Medium	Medium
Blighia sapida	BGV List	Central Africa	Frutales	Fruits and nuts	Frutales menores	Distant	MinorConcern	Undetermined	Undetermined
Alibertia patinoi	BGV List	Tropical South America	Frutales	Fruits and nuts	Frutales menores	Local	NotEvaluated	Low	Undetermined
Cajanus cajan	BGV List	South Asia	Leguminosas	Leguminous crops	Guandul	Distant	NotEvaluated	Medium	Medium
Campomanesia lineatifolia	BGV List	Tropical South America	Frutales	Fruits and nuts	Frutales menores	Local	MinorConcern	Low	Medium
Canna indica	BGV List	Tropical South America	Tuberculos	Root/tuber crops with high starch or inulin conten	Achira	Local	MinorConcern	Low	Low
Capsicum annuum	BGV List	Central America y Mexico	Hortalizas	Vegetables and melons	Ají	Close	MinorConcern	Medium	Low
Capsicum frutescens	BGV List	Central America y Mexico	Hortalizas	Vegetables and melons	Ají	Close	MinorConcern	Low	Low
Carica papaya	BGV List	Tropical South America	Frutales	Fruits and nuts	Papaya	Local	MinorConcern	High	High
Caryodendron orinocense	BGV List	Tropical South America	Otros permanentes	Other crops	Forestal	Local	NotEvaluated	Undetermined	Undetermined
Casimiroa edulis	BGV List	Tropical South America	Frutales	Fruits and nuts	Frutales menores	Local	MinorConcern	Undetermined	Undetermined
Casimiroa tetrameria	BGV List	Central America y Mexico	Plantas aromaticas condimentarias y medicinales	Beverage and spice crops	Frutales menores	Close	MinorConcern	Undetermined	Undetermined
Chenopodium quinoa	BGV List	Andes	Cereales	Cereals	Quinua	Local	MinorConcern	Medium	Medium
Chrysophyllum cainito	BGV List	Central America y Mexico	Frutales	Fruits and nuts	Frutales menores	Close	Threatened	Low	Medium
Citrus amblycarpa	BGV List	East Asia	Frutales	Fruits and nuts	Cítricos	Distant	NotEvaluated	Low	Low
Citrus aurantiifolia	BGV List	East Asia	Frutales	Fruits and nuts	Cítricos	Distant	MinorConcern	High	Low
Citrus aurantium	BGV List	East Asia	Frutales	Fruits and nuts	Cítricos	Distant	MinorConcern	Low	Low
Citrus clementina	BGV List	East Asia	Frutales	Fruits and nuts	Cítricos	Distant	NotEvaluated	Low	Low
Citrus excelsa	BGV List	East Asia	Frutales	Fruits and nuts	Cítricos	Distant	NotEvaluated	Low	Low
Citrus grandis	BGV List	East Asia	Frutales	Fruits and nuts	Cítricos	Distant	NotEvaluated	Low	Low
Citrus jambhiri	BGV List	East Asia	Frutales	Fruits and nuts	Cítricos	Distant	NotEvaluated	Low	Low
Citrus latifolia	BGV List	East Asia	Frutales	Fruits and nuts	Cítricos	Distant	NotEvaluated	Low	Medium
Citrus limon	BGV List	East Asia	Frutales	Fruits and nuts	Cítricos	Distant	NotEvaluated	Low	Low
Citrus lycopersicae	BGV List	East Asia	Frutales	Fruits and nuts	Cítricos	Distant	NotEvaluated	Low	Low
Citrus medica	BGV List	East Asia	Frutales	Fruits and nuts	Cítricos	Distant	MinorConcern	Low	Low
Citrus natsudaidai	BGV List	East Asia	Frutales	Fruits and nuts	Cítricos	Distant	NotEvaluated	Low	Low
Citrus paradisi	BGV List	East Asia	Frutales	Fruits and nuts	Cítricos	Distant	NotEvaluated	Low	Low
Citrus reticulata	BGV List	East Asia	Frutales	Fruits and nuts	Cítricos	Distant	MinorConcern	Medium	Medium
Citrus sinensis	BGV List	East Asia	Frutales	Fruits and nuts	Cítricos	Distant	NotEvaluated	Medium	Low
Citrus volkameriana	BGV List	East Asia	Frutales	Fruits and nuts	Cítricos	Distant	NotEvaluated	Low	Low
Citrus webberii	BGV List	East Asia	Frutales	Fruits and nuts	Cítricos	Distant	NotEvaluated	Low	Low
Clausena lansium	BGV List	East Asia	Frutales	Fruits and nuts	Cítricos	Distant	MinorConcern	Low	Low
Coccoloba uvifera	BGV List	Caribbean	Otros permanentes	Other crops	Frutales menores	Close	NotEvaluated	Undetermined	Undetermined
Cocos nucifera	BGV List	South Asia	Frutales	Fruits and nuts	Coco	Distant	MinorConcern	Medium	Medium
Cucurbita ficifolia	BGV List	Central America y Mexico	Hortalizas	Vegetables and melons	Cucurbitaceas	Close	NotEvaluated	Medium	Low
Cucurbita maxima	BGV List	Central America y Mexico	Hortalizas	Vegetables and melons	Cucurbitaceas	Close	NotEvaluated	Medium	High
Cucurbita moschata	BGV List	Central America y Mexico	Hortalizas	Vegetables and melons	Cucurbitaceas	Close	NotEvaluated	Medium	Medium
Cucurbita pepo	BGV List	Central America y Mexico	Hortalizas	Vegetables and melons	Cucurbitaceas	Close	NotEvaluated	Medium	Medium
Cyclanthera pedata	BGV List	Tropical South America	Hortalizas	Vegetables and melons	Cucurbitaceas	Local	NotEvaluated	Low	Medium
Dillenia indica	BGV List	Southeast Asia	Frutales	Fruits and nuts	Frutales menores	Distant	Threatened	Undetermined	Undetermined
Dioscorea esculenta	BGV List	South Asia	Tuberculos	Root/tuber crops with high starch or inulin conten	Ñame	Distant	MinorConcern	Medium	Medium
Dioscorea trifida	BGV List	Tropical South America	Tuberculos	Root/tuber crops with high starch or inulin conten	Ñame	Local	MinorConcern	Low	Low
Diospyros discolor	BGV List	Southeast Asia	Otros permanentes	Other crops	Frutales menores	Distant	NotEvaluated	Undetermined	Undetermined
Elaeis guineensis	BGV List	Tropical South America	Oleaginosas	Oilseed crops	Palma africana	Local	MinorConcern	High	Undetermined
Elaeis oleifera	BGV List	Tropical South America	Oleaginosas	Oilseed crops	Palma americana	Local	Threatened	Low	Undetermined
Eriobotrya japonica	BGV List	East Asia	Frutales	Fruits and nuts	Frutales menores	Distant	MinorConcern	Undetermined	Low
Syzygium malaccense	BGV List	East Asia	Frutales	Fruits and nuts	Frutales menores	Distant	MinorConcern	Undetermined	Undetermined
Eugenia stipitata	BGV List	Tropical South America	Frutales	Fruits and nuts	Frutales amazónicos	Local	NotEvaluated	Undetermined	Medium
Eugenia uniflora L.	BGV List	Tropical South America	Frutales	Fruits and nuts	Frutales menores	Local	NotEvaluated	Undetermined	Undetermined
Euterpe catinga	BGV List	Tropical South America	Frutales	Fruits and nuts	Frutales amazónicos	Local	MinorConcern	Low	Low
Euterpe oleracea	BGV List	Tropical South America	Frutales	Fruits and nuts	Frutales amazónicos	Local	MinorConcern	Low	Undetermined
Euterpe precatoria	BGV List	Tropical South America	Oleaginosas	Oilseed crops	Frutales amazónicos	Local	MinorConcern	Low	Undetermined
Ficus carica	BGV List	West Asia	Frutales	Fruits and nuts	Frutales menores	Distant	MinorConcern	Medium	Low
Flacourtia indica	BGV List	East Africa	Otros permanentes	Other crops	Frutales menores	Distant	MinorConcern	Undetermined	Undetermined
Garcinia dulcis	BGV List	Southeast Asia	Frutales	Fruits and nuts	Frutales menores	Distant	NotEvaluated	Undetermined	Undetermined
Garcinia macrophylla	BGV List	Tropical South America	Otros permanentes	Other crops	Frutales menores	Local	NotEvaluated	Undetermined	Undetermined
Garcinia madrunno	BGV List	Tropical South America	Frutales	Fruits and nuts	Frutales menores	Local	NotEvaluated	Undetermined	Medium
Garcinia mangostana	BGV List	Southeast Asia	Frutales	Fruits and nuts	Frutales menores	Distant	NotEvaluated	Undetermined	Undetermined
Genipa americana	BGV List	Tropical South America	Frutales	Fruits and nuts	Frutales menores	Local	Threatened	Undetermined	Undetermined
Glycine max	BGV List	East Asia	Leguminosas	Leguminous crops	Soya	Distant	Threatened	Medium	Low
Gossypium arboreum	BGV List	South Asia	Fibras	Other crops	Algodón	Distant	Threatened	High	Undetermined
Gossypium barbadense	BGV List	Tropical South America	Fibras	Other crops	Algodón	Local	NotEvaluated	High	Undetermined
Gossypium hirsutum	BGV List	Central America y Mexico	Fibras	Other crops	Algodón	Close	Threatened	High	Undetermined
Gustavia superba	BGV List	Tropical South America	Otros permanentes	Other crops	Frutales menores	Local	MinorConcern	Undetermined	Undetermined
Gynerium sagittatum	BGV List	Tropical South America	Fibras	Other crops	Caña flecha	Local	MinorConcern	Low	Undetermined
Hibiscus elatus	BGV List	Caribbean	Otros permanentes	Other crops	Forestal	Close	MinorConcern	Undetermined	Undetermined
Hordeum vulgare	BGV List	Central Asia	Cereales	Cereals	Cebada	Distant	MinorConcern	Medium	Low
Hymenaea courbaril	BGV List	Caribbean	Frutales	Fruits and nuts	Frutales menores	Close	MinorConcern	Low	Low
Inga spectabilis	BGV List	Tropical South America	Leguminosas	Leguminous crops	Frutales menores	Local	MinorConcern	Low	Undetermined
Ipomoea batatas	BGV List	Central America y Mexico	Tuberculos	Root/tuber crops with high starch or inulin conten	Batata	Close	NotEvaluated	High	High
Lecythis minor	BGV List	Tropical South America	Otros permanentes	Other crops	Frutales menores	Local	MinorConcern	Undetermined	Undetermined
Litchi chinensis	BGV List	East Asia	Frutales	Fruits and nuts	Frutales menores	Distant	MinorConcern	Undetermined	Undetermined
Lupinus mutabilis	BGV List	Andes	Leguminosas	Leguminous crops	Lupinos	Local	NotEvaluated	Undetermined	Undetermined
Macadamia integrifolia	BGV List	Australia	Frutales	Fruits and nuts	Frutales menores	Distant	Threatened	Low	Undetermined
Macadamia tetraphylla	BGV List	Australia	Frutales	Fruits and nuts	Frutales menores	Distant	Threatened	Low	Undetermined
Malpighia glabra	BGV List	Central America y Mexico	Otros permanentes	Other crops	Frutales menores	Close	NotEvaluated	Undetermined	Undetermined
Malpighia punicifolia	BGV List	Central America y Mexico	Frutales	Fruits and nuts	Frutales menores	Close	NotEvaluated	Undetermined	Undetermined
Mammea americana	BGV List	Tropical South America	Frutales	Fruits and nuts	Frutales menores	Local	MinorConcern	Low	Medium
Mangifera indica	BGV List	South Asia	Frutales	Fruits and nuts	Mango	Distant	NotEvaluated	Medium	High
Manilkara zapota	BGV List	Central America y Mexico	Frutales	Fruits and nuts	Frutales menores	Close	NotEvaluated	Medium	Medium
Melicoccus bijugatus	BGV List	Tropical South America	Frutales	Fruits and nuts	Frutales menores	Local	NotEvaluated	Low	Undetermined
Morinda citrifolia	BGV List	Southeast Asia	Frutales	Fruits and nuts	Frutales menores	Distant	Threatened	Low	Undetermined
Moringa oleifera	BGV List	South Asia	Plantas aromaticas condimentarias y medicinales	Beverage and spice crops	Frutales menores	Distant	MinorConcern	Undetermined	Undetermined
Myrciaria cauliflora	BGV List	Tropical South America	Frutales	Fruits and nuts	Frutales menores	Local	NotEvaluated	Undetermined	Undetermined
Myrciaria dubia	BGV List	Tropical South America	Frutales	Fruits and nuts	Frutales amazónicos	Local	NotEvaluated	Undetermined	Low
Nicotiana tabacum	BGV List	Central America y Mexico	Otros permanentes	Other crops	Tabaco	Close	NotEvaluated	Low	Undetermined
Oryza sativa	BGV List	East Asia	Cereales	Cereals	Arroz	Distant	NotEvaluated	High	High
Pachira aquatica	BGV List	Central America y Mexico	Otros permanentes	Other crops	Forestal	Close	MinorConcern	Undetermined	Undetermined
Passiflora edulis	BGV List	Tropical South America	Frutales	Fruits and nuts	Passifloras	Local	MinorConcern	Medium	Low
Passiflora ligularis	BGV List	Tropical South America	Frutales	Fruits and nuts	Passifloras	Local	MinorConcern	Medium	Medium
Patinoa almirajo	BGV List	Tropical South America	Frutales	Fruits and nuts	Frutales menores	Local	NotEvaluated	Undetermined	Undetermined
Persea americana	BGV List	Central America y Mexico	Frutales	Fruits and nuts	Aguacate	Close	MinorConcern	Medium	Medium
Persea caerulea	BGV List	Central America y Mexico	Frutales	Fruits and nuts	Aguacate	Close	MinorConcern	Undetermined	Undetermined
Phaseolus coccineus	BGV List	Central America y Mexico	Leguminosas	Leguminous crops	Frijol	Close	MinorConcern	High	High
Phaseolus vulgaris	BGV List	Central America y Mexico	Leguminosas	Leguminous crops	Frijol	Close	MinorConcern	Medium	High
Phyllanthus acidus	BGV List	South Asia	Otros permanentes	Other crops	Frutales menores	Distant	NotEvaluated	Undetermined	Undetermined
Physalis peruviana	BGV List	Tropical South America	Frutales	Fruits and nuts	Uchuva	Local	MinorConcern	High	Low
Pisum sativum	BGV List	Southwest Europe	Leguminosas	Leguminous crops	Arveja	Distant	MinorConcern	Low	Medium
Poncirus trifoliata	BGV List	East Asia	Frutales	Fruits and nuts	Cítricos	Distant	NotEvaluated	Low	Low
Pouteria caimito	BGV List	Tropical South America	Frutales	Fruits and nuts	Frutales menores	Local	NotEvaluated	Undetermined	Undetermined
Pouteria campechiana	BGV List	Central America y Mexico	Frutales	Fruits and nuts	Frutales menores	Close	NotEvaluated	Medium	Medium
Pouteria lucuma	BGV List	Tropical South America	Frutales	Fruits and nuts	Frutales menores	Local	NotEvaluated	Undetermined	Undetermined
Psidium guajava	BGV List	Tropical South America	Frutales	Fruits and nuts	Guayaba	Local	MinorConcern	Medium	High
Punica granatum	BGV List	West Asia	Frutales	Fruits and nuts	Frutales menores	Distant	MinorConcern	Undetermined	Undetermined
Matisia cordata	BGV List	Tropical South America	Frutales	Fruits and nuts	Frutales menores	Local	NotEvaluated	Undetermined	Undetermined
Ricinus communis	BGV List	West Asia	Oleaginosas	Oilseed crops	Higuerilla	Distant	MinorConcern	Low	Undetermined
Rubus floribundus	BGV List	Andes	Frutales	Fruits and nuts	Mora	Local	NotEvaluated	Low	Undetermined
Rubus glaucus	BGV List	Andes	Frutales	Fruits and nuts	Mora	Local	NotEvaluated	Medium	Medium
Rubus idaeus	BGV List	Southwest Europe	Frutales	Fruits and nuts	Mora	Distant	MinorConcern	Low	Undetermined
Rubus urticifolius	BGV List	Tropical South America	Frutales	Fruits and nuts	Mora	Local	MinorConcern	Low	Undetermined
Saccharum officinarum	BGV List	South Asia	Otros permanentes	Sugar crops	Caña de azucar	Distant	NotEvaluated	High	Low
Smallanthus sonchifolius	BGV List	Andes	Tuberculos	Root/tuber crops with high starch or inulin conten	Yacon	Local	NotEvaluated	High	Medium
Solanum betaceum	BGV List	Andes	Frutales	Fruits and nuts	Tomate de árbol	Local	NotEvaluated	Medium	Medium
Solanum lycopersicum	BGV List	Andes	Hortalizas	Vegetables and melons	Tomate de mesa	Local	NotEvaluated	High	Medium
Solanum melongena	BGV List	East Asia	Hortalizas	Vegetables and melons	Berenjena	Distant	NotEvaluated	Medium	Medium
Solanum phureja	BGV List	Andes	Tuberculos	Root/tuber crops with high starch or inulin conten	Papa	Local	NotEvaluated	Medium	High
Solanum quitoense	BGV List	Andes	Frutales	Fruits and nuts	Lulo	Local	NotEvaluated	Medium	Medium
Solanum tuberosum	BGV List	Andes	Tuberculos	Root/tuber crops with high starch or inulin conten	Papa	Local	MinorConcern	High	High
Sorghum vulgare	BGV List	East Africa	Cereales	Cereals	Sorgo	Distant	NotEvaluated	Low	Undetermined
Spondias purpurea	BGV List	Tropical South America	Frutales	Fruits and nuts	Frutales menores	Local	MinorConcern	Undetermined	Low
Spondias tuberosa	BGV List	Tropical South America	Frutales	Fruits and nuts	Frutales menores	Local	MinorConcern	Undetermined	Undetermined
Sterculia apetala	BGV List	Central America y Mexico	Otros permanentes	Other crops	Frutales menores	Close	MinorConcern	Undetermined	Undetermined
Synsepalum dulcificum	BGV List	West Africa	Frutales	Fruits and nuts	Frutales menores	Distant	NotEvaluated	Undetermined	Undetermined
Syzygium jambos	BGV List	Southeast Asia	Frutales	Fruits and nuts	Frutales menores	Distant	MinorConcern	Low	Medium
Tabernaemontana heyneana	BGV List	South Asia	Frutales	Fruits and nuts	Frutales menores	Distant	MinorConcern	Undetermined	Undetermined
Tamarindus indica	BGV List	East Africa	Frutales	Fruits and nuts	Frutales menores	Distant	MinorConcern	Low	Low
Terminalia catappa	BGV List	South Asia	Frutales	Fruits and nuts	Frutales menores	Distant	MinorConcern	Undetermined	Undetermined
Theobroma bicolor	BGV List	Central America y Mexico	Frutales	Fruits and nuts	Cacao	Close	NotEvaluated	High	High
Theobroma cacao	BGV List	Tropical South America	Otros permanentes	Other crops	Cacao	Local	MinorConcern	High	High
Theobroma grandiflorum	BGV List	Tropical South America	Frutales	Fruits and nuts	Cacao	Local	NotEvaluated	Low	Low
Triticum aestivum	BGV List	Central Asia	Cereales	Cereals	Trigo	Distant	NotEvaluated	Medium	Medium
Vaccinium meridionale	BGV List	Tropical South America	Frutales	Fruits and nuts	Mortiño	Local	NotEvaluated	Medium	Undetermined
Vicia faba	BGV List	West Asia	Leguminosas	Leguminous crops	Haba	Distant	MinorConcern	Medium	Medium
Vigna radiata	BGV List	East Asia	Leguminosas	Leguminous crops	Mungo	Distant	MinorConcern	Undetermined	Undetermined
Zea mays	BGV List	Central America y Mexico	Cereales	Cereals	Maíz	Close	MinorConcern	Medium	Medium
Ziziphus mauritiana	BGV List	Southeast Asia	Otros permanentes	Other crops	Frutales menores	Distant	MinorConcern	Undetermined	Undetermined
Zizyphus jujuba	BGV List	Southeast Asia	Otros permanentes	Other crops	Frutales menores	Distant	NotEvaluated	Undetermined	Low
Musa balbisiana	BGV List	Southeast Asia	Frutales	Fruits and nuts	Musaceas	Distant	Threatened	Medium	Medium
Musa acuminata	BGV List	Southeast Asia	Frutales	Fruits and nuts	Musaceas	Distant	MinorConcern	Medium	Medium
Musa laterita	BGV List	Southeast Asia	Frutales	Fruits and nuts	Musaceas	Distant	NotEvaluated	Medium	Medium
Musa ornata	BGV List	Southeast Asia	Frutales	Fruits and nuts	Musaceas	Distant	NotEvaluated	Medium	Medium
Musa textilis	BGV List	Southeast Asia	Frutales	Fruits and nuts	Musaceas	Distant	NotEvaluated	Medium	Medium
Musa basjoo	BGV List	Southeast Asia	Frutales	Fruits and nuts	Musaceas	Distant	MinorConcern	Medium	Medium
Musa itinerans	BGV List	Southeast Asia	Frutales	Fruits and nuts	Musaceas	Distant	Threatened	Medium	Medium
Musa velutina	BGV List	East Asia	Frutales	Fruits and nuts	Musaceas	Distant	NotEvaluated	Medium	Medium
Cucumis melo	BGV List	East Africa	Frutales	Fruits and nuts	Frutales menores	Distant	MinorConcern	Medium	Undetermined
Passiflora maliformis	BGV List	Caribbean	Frutales	Fruits and nuts	Passifloras	Close	MinorConcern	Medium	Undetermined
Passiflora tarminiana	BGV List	Andes	Frutales	Fruits and nuts	Passifloras	Local	MinorConcern	Low	Undetermined
Solanum sessiliflorum	BGV List	Tropical South America	Frutales	Fruits and nuts	Lulo	Local	NotEvaluated	Low	Medium
Calopogonium mucunoides	BGV List	Tropical South America	NA	Other crops	Pastos y Forrajes	Local	MinorConcern	Undetermined	Undetermined
Canavalia ensiformis	BGV List	West Africa	NA	Leguminous crops	Pastos y Forrajes	Distant	NotEvaluated	Undetermined	Undetermined
Capsicum abbreviatum	BGV List	Tropical South America	NA	Beverage and spice crops	Ají	Local	NotEvaluated	Medium	Low
Capsicum baccatum	BGV List	Tropical South America	NA	Beverage and spice crops	Ají	Local	MinorConcern	Medium	Low
Capsicum chinense	BGV List	Central America y Mexico	NA	Beverage and spice crops	Ají	Close	NotEvaluated	Medium	Low
Capsicum praetermissum	BGV List	Tropical South America	NA	Beverage and spice crops	Ají	Local	NotEvaluated	Medium	Low
Capsicum pubescens	BGV List	Tropical South America	NA	Beverage and spice crops	Ají	Local	NotEvaluated	Medium	Low
Citrus japonica	BGV List	East Asia	NA	Fruits and nuts	Cítricos	Distant	Threatened	Low	Low
Crotalaria anagyroides	BGV List	Central America y Mexico	NA	Other crops	Pastos y Forrajes	Close	MinorConcern	Undetermined	Undetermined
Crotalaria juncea	BGV List	South Asia	NA	Other crops	Pastos y Forrajes	Distant	NotEvaluated	Undetermined	Undetermined
Crotalaria lanceolata	BGV List	Southeast Africa	NA	Other crops	Pastos y Forrajes	Distant	MinorConcern	Undetermined	Undetermined
Crotalaria ochroleuca	BGV List	West Africa	NA	Other crops	Pastos y Forrajes	Distant	MinorConcern	Undetermined	Undetermined
Crotalaria retusa	BGV List	Tropical Asia	NA	Other crops	Pastos y Forrajes	Distant	MinorConcern	Undetermined	Undetermined
Crotalaria spectabilis	BGV List	Tropical Asia	NA	Other crops	Pastos y Forrajes	Distant	MinorConcern	Undetermined	Undetermined
Crotalaria striata	BGV List	West Africa	NA	Other crops	Pastos y Forrajes	Distant	NotEvaluated	Undetermined	Undetermined
Dioscorea alata	BGV List	Southeast Asia	NA	Root/tuber crops with high starch or inulin conten	Ñame	Distant	MinorConcern	Medium	Medium
Dioscorea bulbifera	BGV List	West Africa	NA	Root/tuber crops with high starch or inulin conten	Ñame	Distant	MinorConcern	Medium	Medium
Dioscorea rotundata	BGV List	Southeastern Asia	NA	Root/tuber crops with high starch or inulin conten	Ñame	Distant	NotEvaluated	Medium	Medium
Leucaena leucocephala	BGV List	Central America y Mexico	NA	Other crops	Pastos y Forrajes	Close	MinorConcern	Undetermined	Undetermined
Lupinus angustifolius	BGV List	South Asia	NA	Other crops	Lupinos	Distant	MinorConcern	Undetermined	Undetermined
Lupinus luteus	BGV List	Southeast Europe	NA	Other crops	Lupinos	Distant	MinorConcern	Undetermined	Undetermined
Mucuna deeringiana	BGV List	Tropical Asia	NA	Leguminous crops	Pastos y Forrajes	Distant	NotEvaluated	Undetermined	Undetermined
Musa coccinea	BGV List	South Asia	NA	Other crops	Musaceas	Distant	NotEvaluated	Medium	Medium
Nicandra physalodes	BGV List	Tropical South America	NA	Other crops	Uchuva	Local	NotEvaluated	High	Low
Panicum miliaceum	BGV List	East Asia	NA	Cereals	Millo	Distant	MinorConcern	Undetermined	Undetermined
Passiflora adenopoda	BGV List	Andes	NA	Fruits and nuts	Passifloras	Local	MinorConcern	Undetermined	Undetermined
Passiflora alata	BGV List	Tropical South America	NA	Fruits and nuts	Passifloras	Local	MinorConcern	Undetermined	Undetermined
Passiflora alnifolia	BGV List	Tropical South America	NA	Fruits and nuts	Passifloras	Local	MinorConcern	Undetermined	Undetermined
Passiflora antioquiensis	BGV List	Tropical South America	NA	Fruits and nuts	Passifloras	Local	MinorConcern	Undetermined	Undetermined
Passiflora apoda	BGV List	Tropical South America	NA	Fruits and nuts	Passifloras	Local	MinorConcern	Undetermined	Undetermined
Passiflora cumbalensis	BGV List	Tropical South America	NA	Fruits and nuts	Passifloras	Local	Threatened	Undetermined	Undetermined
Passiflora foetida	BGV List	Tropical South America	NA	Fruits and nuts	Passifloras	Local	MinorConcern	Undetermined	Undetermined
Passiflora gracilis	BGV List	Tropical South America	NA	Fruits and nuts	Passifloras	Local	MinorConcern	Undetermined	Undetermined
Passiflora hahnii	BGV List	Central America y Mexico	NA	Fruits and nuts	Passifloras	Close	NotEvaluated	Undetermined	Undetermined
Passiflora jardinensis	BGV List	Tropical South America	NA	Fruits and nuts	Passifloras	Local	Threatened	Undetermined	Undetermined
Passiflora laurifolia	BGV List	Tropical South America	NA	Fruits and nuts	Passifloras	Local	MinorConcern	Undetermined	Undetermined
Passiflora manicata	BGV List	Tropical South America	NA	Fruits and nuts	Passifloras	Local	MinorConcern	Undetermined	Undetermined
Passiflora mixta	BGV List	Tropical South America	NA	Fruits and nuts	Passifloras	Local	MinorConcern	Undetermined	Undetermined
Passiflora mollissima	BGV List	Tropical South America	NA	Fruits and nuts	Passifloras	Local	MinorConcern	Undetermined	Undetermined
Passiflora pinnatistipula	BGV List	Tropical South America	NA	Fruits and nuts	Passifloras	Local	MinorConcern	Undetermined	Undetermined
Passiflora sanguinolenta	BGV List	Tropical South America	NA	Fruits and nuts	Passifloras	Local	NotEvaluated	Undetermined	Undetermined
Passiflora tiliifolia	BGV List	Tropical South America	NA	Fruits and nuts	Passifloras	Local	MinorConcern	Undetermined	Undetermined
passiflora tripartita	BGV List	Tropical South America	NA	Fruits and nuts	Passifloras	Local	MinorConcern	Undetermined	Undetermined
Passiflora vitifolia	BGV List	Tropical South America	NA	Fruits and nuts	Passifloras	Local	MinorConcern	Undetermined	Undetermined
Pennisetum glaucum* Cenchrus americanus	BGV List	West Asia	NA	Cereals	Millo	Distant	MinorConcern	Undetermined	Undetermined
Phaseolus lunatus	BGV List	Tropical South America	NA	Leguminous crops	Frijol	Local	MinorConcern	Medium	High
Physalis aequata* Physalis ixocarpa	BGV List	Central America y Mexico	NA	Fruits and nuts	Uchuva	Close	NotEvaluated	High	Low
Physalis alkekengi	BGV List	Southeast Europe	NA	Fruits and nuts	Uchuva	Distant	MinorConcern	High	Low
Physalis angulata	BGV List	North America	NA	Fruits and nuts	Uchuva	Distant	MinorConcern	High	Low
Physalis coztomatl	BGV List	Tropical South America	NA	Fruits and nuts	Uchuva	Local	MinorConcern	High	Low
Physalis floridana*Physalis pubescens	BGV List	Central America y Mexico	NA	Fruits and nuts	Uchuva	Close	NotEvaluated	High	Low
Physalis fuscomaculata	BGV List	Europe	NA	Fruits and nuts	Uchuva	Distant	NotEvaluated	High	Low
Physalis mendocina	BGV List	Central America y Mexico	NA	Fruits and nuts	Uchuva	Close	NotEvaluated	High	Low
Physalis mexicana	BGV List	Central America y Mexico	NA	Fruits and nuts	Uchuva	Close	NotEvaluated	High	Low
Physalis philadelphica	BGV List	Central America y Mexico	NA	Fruits and nuts	Uchuva	Close	MinorConcern	High	Low
Physalis pruinosa	BGV List	Central America y Mexico	NA	Fruits and nuts	Uchuva	Close	MinorConcern	High	Low
Physalis viscosa	BGV List	Tropical South America	NA	Fruits and nuts	Uchuva	Local	MinorConcern	High	Low
Psidium friedrichsthalianum	BGV List	Tropical South America	NA	Fruits and nuts	Guayaba	Local	NotEvaluated	Undetermined	Undetermined
Rubus niveus	BGV List	South Asia	NA	Fruits and nuts	Mora	Distant	MinorConcern	Low	Undetermined
Sesamum indicum	BGV List	West Asia	Oleaginosas	Oilseed crops	Ajonjolí	Distant	NotEvaluated	Undetermined	Low
Sicana odorifera	BGV List	Tropical South America	NA	Vegetables and melons	Cucurbitaceas	Local	NotEvaluated	Medium	Medium
Solanum amotapense	BGV List	Andes	NA	Vegetables and melons	Tomate de árbol	Local	Threatened	Medium	Medium
Solanum andreanum	BGV List	Tropical South America	NA	Root/tuber crops with high starch or inulin conten	Papa	Local	NotEvaluated	High	High
Solanum antipoviczii	BGV List	Central America y Mexico	NA	Root/tuber crops with high starch or inulin conten	Papa	Close	NotEvaluated	High	High
Solanum atropurpureum	BGV List	Tropical South America	NA	Vegetables and melons	Lulo	Local	NotEvaluated	Medium	Medium
Solanum candolleanum	BGV List	Tropical South America	NA	Root/tuber crops with high starch or inulin conten	Papa	Local	NotEvaluated	High	High
Solanum capsicoides	BGV List	Tropical South America	NA	Vegetables and melons	Lulo	Local	MinorConcern	Medium	Medium
Solanum cardiophyllum	BGV List	Central America y Mexico	NA	Root/tuber crops with high starch or inulin conten	Papa	Close	MinorConcern	High	High
Solanum caripense	BGV List	Tropical South America	NA	Vegetables and melons	Lulo	Local	NotEvaluated	Medium	Medium
Solanum chrenhkigii	BGV List	NA	NA	Root/tuber crops with high starch or inulin conten	Papa	Close	NotEvaluated	High	High
Solanum colombianum	BGV List	Tropical South America	NA	Root/tuber crops with high starch or inulin conten	Papa	Local	MinorConcern	High	High
Solanum commersonii	BGV List	Tropical South America	NA	Root/tuber crops with high starch or inulin conten	Papa	Local	NotEvaluated	High	High
Solanum corymbiflorum	BGV List	Tropical South America	NA	Fruit and nuts	Tomate de árbol	Local	MinorConcern	Medium	Medium
Solanum curtilobum	BGV List	Andes	NA	Root/tuber crops with high starch or inulin conten	Papa	Local	NotEvaluated	High	High
Solanum demissum	BGV List	Central America y Mexico	NA	Root/tuber crops with high starch or inulin conten	Papa	Close	MinorConcern	High	High
Solanum depexum* Solanum acaule	BGV List	Andes	NA	Root/tuber crops with high starch or inulin conten	Papa	Local	NotEvaluated	High	High
Solanum diversifolium	BGV List	Tropical South America	NA	Fruit and nuts	Tomate de árbol	Local	MinorConcern	Medium	Medium
Solanum faoensis	BGV List	NA	NA	Root/tuber crops with high starch or inulin conten	Papa	Close	NotEvaluated	High	High
Solanum ferox	BGV List	Southeast Asia	NA	Fruits and nuts	Lulo	Distant	NotEvaluated	Medium	Medium
Solanum flahaultii	BGV List	Andes	NA	Root/tuber crops with high starch or inulin conten	Papa	Local	NotEvaluated	High	High
Solanum garcia-barrigae	BGV List	Andes	NA	Root/tuber crops with high starch or inulin conten	Papa	Local	NotEvaluated	High	High
Solanum hartwegii	BGV List	Central America y Mexico	NA	Fruits and nuts	Tomate de árbol	Close	NotEvaluated	Medium	Medium
Solanum hirtum	BGV List	Central America y Mexico	NA	Fruit and nuts	Lulo	Close	NotEvaluated	Medium	Medium
Solanum jamaicense	BGV List	Central America y Mexico	NA	Vegetables and melons	Lulo	Close	MinorConcern	Medium	Medium
Solanum jamesii	BGV List	Central America y Mexico	NA	Root/tuber crops with high starch or inulin conten	Papa	Close	MinorConcern	High	High
Solanum juglandifolium	BGV List	Andes	NA	Root/tuber crops with high starch or inulin conten	Papa	Local	NotEvaluated	High	High
Solanum juzepczukii	BGV List	Andes	NA	Root/tuber crops with high starch or inulin conten	Papa	Local	NotEvaluated	High	High
Solanum lobianum*Solanum lobbianum	BGV List	NA	NA	Root/tuber crops with high starch or inulin conten	Papa	Close	NotEvaluated	High	High
Solanum malinchense	BGV List	Central America y Mexico	NA	Root/tuber crops with high starch or inulin conten	Papa	Close	NotEvaluated	High	High
Solanum mammosum	BGV List	Andes	NA	Fruit and nuts	Lulo	Local	MinorConcern	Medium	Medium
Solanum marginatum	BGV List	East Africa	NA	Fruit and nuts	Lulo	Distant	NotEvaluated	Medium	Medium
Solanum maternum	BGV List	Andes	NA	Fruits and nuts	Tomate de árbol	Local	NotEvaluated	Medium	Medium
Solanum moscopanum	BGV List	Andes	NA	Root/tuber crops with high starch or inulin conten	Papa	Local	MinorConcern	High	High
Solanum obliquum	BGV List	Andes	NA	Fruit and nuts	Tomate de árbol	Local	MinorConcern	Medium	Medium
Solanum parodii*Solanum chacoense	BGV List	Andes	NA	Root/tuber crops with high starch or inulin conten	Papa	Local	NotEvaluated	High	High
Solanum pectinatum	BGV List	Central America y Mexico	NA	Fruit and nuts	Lulo	Close	NotEvaluated	Medium	Medium
Solanum peruvianum	BGV List	Andes	NA	Vegetables and melons	Tomate de mesa	Local	NotEvaluated	High	Medium
Solanum pimpinellifolium	BGV List	Andes	NA	Vegetables and melons	Tomate de mesa	Local	NotEvaluated	High	Medium
Solanum pseudolulo	BGV List	Andes	NA	Fruits and nuts	Lulo	Local	NotEvaluated	Medium	Medium
Solanum saponaceum	BGV List	Andes	NA	Fruit and nuts	Lulo	Local	MinorConcern	Medium	Medium
Solanum sibundoyense	BGV List	Andes	NA	Fruit and nuts	Tomate de árbol	Local	Threatened	Medium	Medium
Solanum stenotomun*Solanum tuberosum YA ESTA ARRIBA	BGV List	NA	NA	Root/tuber crops with high starch or inulin conten	Papa	Local	NotEvaluated	High	High
Solanum tuquerrense*Solanum andreanum	BGV List	Andes	NA	Root/tuber crops with high starch or inulin conten	Papa	Local	NotEvaluated	High	High
Solanum unilobum	BGV List	Andes	NA	Fruits and nuts	Tomate de árbol	Local	NotEvaluated	Medium	Medium
Solanum vestissimum	BGV List	Andes	NA	Fruits and nuts	Lulo	Local	NotEvaluated	Medium	Medium
Stylosanthes guianensis	BGV List	Central America y Mexico	NA	Other crops	Pastos y Forrajes	Close	MinorConcern	Undetermined	Undetermined
Vigna unguiculata	BGV List	West Africa	NA	Leguminous crops	Caupi	Distant	MinorConcern	Undetermined	Undetermined
Citrus macrophylla	BGV List	East Asia	Frutales	Fruits and nuts	Cítricos	Distant	NotEvaluated	Low	Low

## Sheet: Food Sec.
Species	Origin	FAO Classification	Crop
Dovyalis hebecarpa	South Asia	Fruits and nuts	Frutales menores
Arachis hypogaea	Tropical South America	Leguminous crops	Maní
Artocarpus altilis	South Asia	Fruits and nuts	Frutales menores
Blighia sapida	Central Africa	Fruits and nuts	Frutales menores
Alibertia patinoi	Tropical South America	Fruits and nuts	Frutales menores
Caryodendron orinocense	Tropical South America	Other crops	Forestal
Casimiroa edulis	Tropical South America	Fruits and nuts	Frutales menores
Casimiroa tetrameria	Central America y Mexico	Beverage and spice crops	Frutales menores
Coccoloba uvifera	Caribbean	Other crops	Frutales menores
Dillenia indica	Southeast Asia	Fruits and nuts	Frutales menores
Diospyros discolor	Southeast Asia	Other crops	Frutales menores
Elaeis guineensis	Tropical South America	Oilseed crops	Palma africana
Elaeis oleifera	Tropical South America	Oilseed crops	Palma americana
Syzygium malaccense	East Asia	Fruits and nuts	Frutales menores
Eugenia uniflora L.	Tropical South America	Fruits and nuts	Frutales menores
Euterpe oleracea	Tropical South America	Fruits and nuts	Frutales amazónicos
Euterpe precatoria	Tropical South America	Oilseed crops	Frutales amazónicos
Flacourtia indica	East Africa	Other crops	Frutales menores
Garcinia dulcis	Southeast Asia	Fruits and nuts	Frutales menores
Garcinia macrophylla	Tropical South America	Other crops	Frutales menores
Garcinia mangostana	Southeast Asia	Fruits and nuts	Frutales menores
Genipa americana	Tropical South America	Fruits and nuts	Frutales menores
Gossypium arboreum	South Asia	Other crops	Algodón
Gossypium barbadense	Tropical South America	Other crops	Algodón
Gossypium hirsutum	Central America y Mexico	Other crops	Algodón
Gustavia superba	Tropical South America	Other crops	Frutales menores
Gynerium sagittatum	Tropical South America	Other crops	Caña flecha
Hibiscus elatus	Caribbean	Other crops	Forestal
Inga spectabilis	Tropical South America	Leguminous crops	Frutales menores
Lecythis minor	Tropical South America	Other crops	Frutales menores
Litchi chinensis	East Asia	Fruits and nuts	Frutales menores
Lupinus mutabilis	Andes	Leguminous crops	Lupinos
Macadamia integrifolia	Australia	Fruits and nuts	Frutales menores
Macadamia tetraphylla	Australia	Fruits and nuts	Frutales menores
Malpighia glabra	Central America y Mexico	Other crops	Frutales menores
Malpighia punicifolia	Central America y Mexico	Fruits and nuts	Frutales menores
Melicoccus bijugatus	Tropical South America	Fruits and nuts	Frutales menores
Morinda citrifolia	Southeast Asia	Fruits and nuts	Frutales menores
Moringa oleifera	South Asia	Beverage and spice crops	Frutales menores
Myrciaria cauliflora	Tropical South America	Fruits and nuts	Frutales menores
Nicotiana tabacum	Central America y Mexico	Other crops	Tabaco
Pachira aquatica	Central America y Mexico	Other crops	Forestal
Patinoa almirajo	Tropical South America	Fruits and nuts	Frutales menores
Persea caerulea	Central America y Mexico	Fruits and nuts	Aguacate
Phyllanthus acidus	South Asia	Other crops	Frutales menores
Pouteria caimito	Tropical South America	Fruits and nuts	Frutales menores
Pouteria lucuma	Tropical South America	Fruits and nuts	Frutales menores
Punica granatum	West Asia	Fruits and nuts	Frutales menores
Matisia cordata	Tropical South America	Fruits and nuts	Frutales menores
Ricinus communis	West Asia	Oilseed crops	Higuerilla
Rubus floribundus	Andes	Fruits and nuts	Mora
Rubus idaeus	Southwest Europe	Fruits and nuts	Mora
Rubus urticifolius	Tropical South America	Fruits and nuts	Mora
Sorghum vulgare	East Africa	Cereals	Sorgo
Spondias tuberosa	Tropical South America	Fruits and nuts	Frutales menores
Sterculia apetala	Central America y Mexico	Other crops	Frutales menores
Synsepalum dulcificum	West Africa	Fruits and nuts	Frutales menores
Tabernaemontana heyneana	South Asia	Fruits and nuts	Frutales menores
Terminalia catappa	South Asia	Fruits and nuts	Frutales menores
Vaccinium meridionale	Tropical South America	Fruits and nuts	Mortiño
Vigna radiata	East Asia	Leguminous crops	Mungo
Ziziphus mauritiana	Southeast Asia	Other crops	Frutales menores
Cucumis melo	East Africa	Fruits and nuts	Frutales menores
Passiflora maliformis	Caribbean	Fruits and nuts	Passifloras
Passiflora tarminiana	Andes	Fruits and nuts	Passifloras
Calopogonium mucunoides	Tropical South America	Other crops	Pastos y Forrajes
Canavalia ensiformis	West Africa	Leguminous crops	Pastos y Forrajes
Crotalaria anagyroides	Central America y Mexico	Other crops	Pastos y Forrajes
Crotalaria juncea	South Asia	Other crops	Pastos y Forrajes
Crotalaria lanceolata	Southeast Africa	Other crops	Pastos y Forrajes
Crotalaria ochroleuca	West Africa	Other crops	Pastos y Forrajes
Crotalaria retusa	Tropical Asia	Other crops	Pastos y Forrajes
Crotalaria spectabilis	Tropical Asia	Other crops	Pastos y Forrajes
Crotalaria striata	West Africa	Other crops	Pastos y Forrajes
Leucaena leucocephala	Central America y Mexico	Other crops	Pastos y Forrajes
Lupinus angustifolius	South Asia	Other crops	Lupinos
Lupinus luteus	Southeast Europe	Other crops	Lupinos
Mucuna deeringiana	Tropical Asia	Leguminous crops	Pastos y Forrajes
Panicum miliaceum	East Asia	Cereals	Millo
Passiflora adenopoda	Andes	Fruits and nuts	Passifloras
Passiflora alata	Tropical South America	Fruits and nuts	Passifloras
Passiflora alnifolia	Tropical South America	Fruits and nuts	Passifloras
Passiflora antioquiensis	Tropical South America	Fruits and nuts	Passifloras
Passiflora apoda	Tropical South America	Fruits and nuts	Passifloras
Passiflora cumbalensis	Tropical South America	Fruits and nuts	Passifloras
Passiflora foetida	Tropical South America	Fruits and nuts	Passifloras
Passiflora gracilis	Tropical South America	Fruits and nuts	Passifloras
Passiflora hahnii	Central America y Mexico	Fruits and nuts	Passifloras
Passiflora jardinensis	Tropical South America	Fruits and nuts	Passifloras
Passiflora laurifolia	Tropical South America	Fruits and nuts	Passifloras
Passiflora manicata	Tropical South America	Fruits and nuts	Passifloras
Passiflora mixta	Tropical South America	Fruits and nuts	Passifloras
Passiflora mollissima	Tropical South America	Fruits and nuts	Passifloras
Passiflora pinnatistipula	Tropical South America	Fruits and nuts	Passifloras
Passiflora sanguinolenta	Tropical South America	Fruits and nuts	Passifloras
Passiflora tiliifolia	Tropical South America	Fruits and nuts	Passifloras
passiflora tripartita	Tropical South America	Fruits and nuts	Passifloras
Passiflora vitifolia	Tropical South America	Fruits and nuts	Passifloras
Pennisetum glaucum/Cenchrus americanus	West Asia	Cereals	Millo
Psidium friedrichsthalianum	Tropical South America	Fruits and nuts	Guayaba
Rubus niveus	South Asia	Fruits and nuts	Mora
Stylosanthes guianensis	Central America y Mexico	Other crops	Pastos y Forrajes
Vigna unguiculata	West Africa	Leguminous crops	Caupi

## Sheet: Economic Imp.
Species	Origin	FAO Classification	Crop
Dovyalis hebecarpa	South Asia	Fruits and nuts	Frutales menores
Artocarpus heterophyllus	Southeast Asia	Fruits and nuts	Frutales menores
Averrhoa carambola	Southeast Asia	Fruits and nuts	Frutales menores
Blighia sapida	Central Africa	Fruits and nuts	Frutales menores
Caryodendron orinocense	Tropical South America	Other crops	Forestal
Casimiroa edulis	Tropical South America	Fruits and nuts	Frutales menores
Casimiroa tetrameria	Central America y Mexico	Beverage and spice crops	Frutales menores
Coccoloba uvifera	Caribbean	Other crops	Frutales menores
Dillenia indica	Southeast Asia	Fruits and nuts	Frutales menores
Diospyros discolor	Southeast Asia	Other crops	Frutales menores
Eriobotrya japonica	East Asia	Fruits and nuts	Frutales menores
Syzygium malaccense	East Asia	Fruits and nuts	Frutales menores
Eugenia stipitata	Tropical South America	Fruits and nuts	Frutales amazónicos
Eugenia uniflora L.	Tropical South America	Fruits and nuts	Frutales menores
Flacourtia indica	East Africa	Other crops	Frutales menores
Garcinia dulcis	Southeast Asia	Fruits and nuts	Frutales menores
Garcinia macrophylla	Tropical South America	Other crops	Frutales menores
Garcinia madrunno	Tropical South America	Fruits and nuts	Frutales menores
Garcinia mangostana	Southeast Asia	Fruits and nuts	Frutales menores
Genipa americana	Tropical South America	Fruits and nuts	Frutales menores
Gustavia superba	Tropical South America	Other crops	Frutales menores
Hibiscus elatus	Caribbean	Other crops	Forestal
Lecythis minor	Tropical South America	Other crops	Frutales menores
Litchi chinensis	East Asia	Fruits and nuts	Frutales menores
Lupinus mutabilis	Andes	Leguminous crops	Lupinos
Malpighia glabra	Central America y Mexico	Other crops	Frutales menores
Malpighia punicifolia	Central America y Mexico	Fruits and nuts	Frutales menores
Moringa oleifera	South Asia	Beverage and spice crops	Frutales menores
Myrciaria cauliflora	Tropical South America	Fruits and nuts	Frutales menores
Myrciaria dubia	Tropical South America	Fruits and nuts	Frutales amazónicos
Pachira aquatica	Central America y Mexico	Other crops	Forestal
Patinoa almirajo	Tropical South America	Fruits and nuts	Frutales menores
Persea caerulea	Central America y Mexico	Fruits and nuts	Aguacate
Phyllanthus acidus	South Asia	Other crops	Frutales menores
Pouteria caimito	Tropical South America	Fruits and nuts	Frutales menores
Pouteria lucuma	Tropical South America	Fruits and nuts	Frutales menores
Punica granatum	West Asia	Fruits and nuts	Frutales menores
Matisia cordata	Tropical South America	Fruits and nuts	Frutales menores
Spondias purpurea	Tropical South America	Fruits and nuts	Frutales menores
Spondias tuberosa	Tropical South America	Fruits and nuts	Frutales menores
Sterculia apetala	Central America y Mexico	Other crops	Frutales menores
Synsepalum dulcificum	West Africa	Fruits and nuts	Frutales menores
Tabernaemontana heyneana	South Asia	Fruits and nuts	Frutales menores
Terminalia catappa	South Asia	Fruits and nuts	Frutales menores
Vigna radiata	East Asia	Leguminous crops	Mungo
Ziziphus mauritiana	Southeast Asia	Other crops	Frutales menores
Zizyphus jujuba	Southeast Asia	Other crops	Frutales menores
Calopogonium mucunoides	Tropical South America	Other crops	Pastos y Forrajes
Canavalia ensiformis	West Africa	Leguminous crops	Pastos y Forrajes
Crotalaria anagyroides	Central America y Mexico	Other crops	Pastos y Forrajes
Crotalaria juncea	South Asia	Other crops	Pastos y Forrajes
Crotalaria lanceolata	Southeast Africa	Other crops	Pastos y Forrajes
Crotalaria ochroleuca	West Africa	Other crops	Pastos y Forrajes
Crotalaria retusa	Tropical Asia	Other crops	Pastos y Forrajes
Crotalaria spectabilis	Tropical Asia	Other crops	Pastos y Forrajes
Crotalaria striata	West Africa	Other crops	Pastos y Forrajes
Leucaena leucocephala	Central America y Mexico	Other crops	Pastos y Forrajes
Lupinus angustifolius	South Asia	Other crops	Lupinos
Lupinus luteus	Southeast Europe	Other crops	Lupinos
Mucuna deeringiana	Tropical Asia	Leguminous crops	Pastos y Forrajes
Panicum miliaceum	East Asia	Cereals	Millo
Passiflora adenopoda	Andes	Fruits and nuts	Passifloras
Passiflora alata	Tropical South America	Fruits and nuts	Passifloras
Passiflora alnifolia	Tropical South America	Fruits and nuts	Passifloras
Passiflora antioquiensis	Tropical South America	Fruits and nuts	Passifloras
Passiflora apoda	Tropical South America	Fruits and nuts	Passifloras
Passiflora cumbalensis	Tropical South America	Fruits and nuts	Passifloras
Passiflora foetida	Tropical South America	Fruits and nuts	Passifloras
Passiflora gracilis	Tropical South America	Fruits and nuts	Passifloras
Passiflora hahnii	Central America y Mexico	Fruits and nuts	Passifloras
Passiflora jardinensis	Tropical South America	Fruits and nuts	Passifloras
Passiflora laurifolia	Tropical South America	Fruits and nuts	Passifloras
Passiflora manicata	Tropical South America	Fruits and nuts	Passifloras
Passiflora mixta	Tropical South America	Fruits and nuts	Passifloras
Passiflora mollissima	Tropical South America	Fruits and nuts	Passifloras
Passiflora pinnatistipula	Tropical South America	Fruits and nuts	Passifloras
Passiflora sanguinolenta	Tropical South America	Fruits and nuts	Passifloras
Passiflora tiliifolia	Tropical South America	Fruits and nuts	Passifloras
passiflora tripartita	Tropical South America	Fruits and nuts	Passifloras
Passiflora vitifolia	Tropical South America	Fruits and nuts	Passifloras
Pennisetum glaucum/Cenchrus americanus	West Asia	Cereals	Millo
Psidium friedrichsthalianum	Tropical South America	Fruits and nuts	Guayaba
Sesamum indicum	West Asia	Oilseed crops	Ajonjolí
Stylosanthes guianensis	Central America y Mexico	Other crops	Pastos y Forrajes
Vigna unguiculata	West Africa	Leguminous crops	Caupi

## Sheet: Vulnerability
Species	Origin	FAO Classification
Dovyalis hebecarpa	South Asia	Fruits and nuts
Allium fistulosum	Central Asia	Vegetables and melons
Allium sativum	Central Asia	Vegetables and melons
Anacardium occidentale	Tropical South America	Fruits and nuts
Annona squamosa	Tropical South America	Fruits and nuts
Arachis hypogaea	Tropical South America	Leguminous crops
Arracacia xanthorrhiza	Andes	Root/tuber crops with high starch or inulin conten
Artocarpus altilis	South Asia	Fruits and nuts
Artocarpus heterophyllus	Southeast Asia	Fruits and nuts
Averrhoa carambola	Southeast Asia	Fruits and nuts
Bixa orellana	Tropical South America	Beverage and spice crops
Alibertia patinoi	Tropical South America	Fruits and nuts
Cajanus cajan	South Asia	Leguminous crops
Caryodendron orinocense	Tropical South America	Other crops
Citrus amblycarpa	East Asia	Fruits and nuts
Citrus clementina	East Asia	Fruits and nuts
Citrus excelsa	East Asia	Fruits and nuts
Citrus grandis	East Asia	Fruits and nuts
Citrus jambhiri	East Asia	Fruits and nuts
Citrus latifolia	East Asia	Fruits and nuts
Citrus limon	East Asia	Fruits and nuts
Citrus lycopersicae	East Asia	Fruits and nuts
Citrus natsudaidai	East Asia	Fruits and nuts
Citrus paradisi	East Asia	Fruits and nuts
Citrus sinensis	East Asia	Fruits and nuts
Citrus volkameriana	East Asia	Fruits and nuts
Citrus webberii	East Asia	Fruits and nuts
Coccoloba uvifera	Caribbean	Other crops
Cucurbita ficifolia	Central America y Mexico	Vegetables and melons
Cucurbita maxima	Central America y Mexico	Vegetables and melons
Cucurbita moschata	Central America y Mexico	Vegetables and melons
Cucurbita pepo	Central America y Mexico	Vegetables and melons
Cyclanthera pedata	Tropical South America	Vegetables and melons
Diospyros discolor	Southeast Asia	Other crops
Eugenia stipitata	Tropical South America	Fruits and nuts
Eugenia uniflora L.	Tropical South America	Fruits and nuts
Garcinia dulcis	Southeast Asia	Fruits and nuts
Garcinia macrophylla	Tropical South America	Other crops
Garcinia madrunno	Tropical South America	Fruits and nuts
Garcinia mangostana	Southeast Asia	Fruits and nuts
Gossypium barbadense	Tropical South America	Other crops
Ipomoea batatas	Central America y Mexico	Root/tuber crops with high starch or inulin conten
Lupinus mutabilis	Andes	Leguminous crops
Malpighia glabra	Central America y Mexico	Other crops
Malpighia punicifolia	Central America y Mexico	Fruits and nuts
Mangifera indica	South Asia	Fruits and nuts
Manilkara zapota	Central America y Mexico	Fruits and nuts
Melicoccus bijugatus	Tropical South America	Fruits and nuts
Myrciaria cauliflora	Tropical South America	Fruits and nuts
Myrciaria dubia	Tropical South America	Fruits and nuts
Nicotiana tabacum	Central America y Mexico	Other crops
Oryza sativa	East Asia	Cereals
Patinoa almirajo	Tropical South America	Fruits and nuts
Phyllanthus acidus	South Asia	Other crops
Poncirus trifoliata	East Asia	Fruits and nuts
Pouteria caimito	Tropical South America	Fruits and nuts
Pouteria campechiana	Central America y Mexico	Fruits and nuts
Pouteria lucuma	Tropical South America	Fruits and nuts
Matisia cordata	Tropical South America	Fruits and nuts
Rubus floribundus	Andes	Fruits and nuts
Rubus glaucus	Andes	Fruits and nuts
Saccharum officinarum	South Asia	Sugar crops
Smallanthus sonchifolius	Andes	Root/tuber crops with high starch or inulin conten
Solanum betaceum	Andes	Fruits and nuts
Solanum lycopersicum	Andes	Vegetables and melons
Solanum melongena	East Asia	Vegetables and melons
Solanum phureja	Andes	Root/tuber crops with high starch or inulin conten
Solanum quitoense	Andes	Fruits and nuts
Sorghum vulgare	East Africa	Cereals
Synsepalum dulcificum	West Africa	Fruits and nuts
Theobroma bicolor	Central America y Mexico	Fruits and nuts
Theobroma grandiflorum	Tropical South America	Fruits and nuts
Triticum aestivum	Central Asia	Cereals
Vaccinium meridionale	Tropical South America	Fruits and nuts
Zizyphus jujuba	Southeast Asia	Other crops
Musa laterita	Southeast Asia	Fruits and nuts
Musa ornata	Southeast Asia	Fruits and nuts
Musa textilis	Southeast Asia	Fruits and nuts
Musa velutina	East Asia	Fruits and nuts
Solanum sessiliflorum	Tropical South America	Fruits and nuts
Canavalia ensiformis	West Africa	Leguminous crops
Capsicum abbreviatum	Tropical South America	Beverage and spice crops
Capsicum chinense	Central America y Mexico	Beverage and spice crops
Capsicum praetermissum	Tropical South America	Beverage and spice crops
Capsicum pubescens	Tropical South America	Beverage and spice crops
Crotalaria juncea	South Asia	Other crops
Crotalaria striata	West Africa	Other crops
Dioscorea rotundata	Southeastern Asia	Root/tuber crops with high starch or inulin conten
Mucuna deeringiana	Tropical Asia	Leguminous crops
Musa coccinea	South Asia	Other crops
Nicandra physalodes	Tropical South America	Other crops
Passiflora hahnii	Central America y Mexico	Fruits and nuts
Passiflora sanguinolenta	Tropical South America	Fruits and nuts
Physalis aequata/ixocarpa	Central America y Mexico	Fruits and nuts
Physalis floridana/pubescens	Central America y Mexico	Fruits and nuts
Physalis fuscomaculata	Europe	Fruits and nuts
Physalis mendocina	Central America y Mexico	Fruits and nuts
Physalis mexicana	Central America y Mexico	Fruits and nuts
Psidium friedrichsthalianum	Tropical South America	Fruits and nuts
Sesamum indicum	West Asia	Oilseed crops
Sicana odorifera	Tropical South America	Vegetables and melons
Solanum andreanum	Tropical South America	Root/tuber crops with high starch or inulin conten
Solanum antipoviczii	Central America y Mexico	Root/tuber crops with high starch or inulin conten
Solanum atropurpureum	Tropical South America	Vegetables and melons
Solanum candolleanum	Tropical South America	Root/tuber crops with high starch or inulin conten
Solanum caripense	Tropical South America	Vegetables and melons
Solanum chrenhkigii	NA	Root/tuber crops with high starch or inulin conten
Solanum commersonii	Tropical South America	Root/tuber crops with high starch or inulin conten
Solanum curtilobum	Andes	Root/tuber crops with high starch or inulin conten
Solanum depexum/acaule	Andes	Root/tuber crops with high starch or inulin conten
Solanum faoensis	NA	Root/tuber crops with high starch or inulin conten
Solanum ferox	Southeast Asia	Fruits and nuts
Solanum flahaultii	Andes	Root/tuber crops with high starch or inulin conten
Solanum garcia-barrigae	Andes	Root/tuber crops with high starch or inulin conten
Solanum hartwegii	Central America y Mexico	Fruits and nuts
Solanum hirtum	Central America y Mexico	Fruits and nuts
Solanum juglandifolium	Andes	Root/tuber crops with high starch or inulin conten
Solanum juzepczukii	Andes	Root/tuber crops with high starch or inulin conten
Solanum lobianum	NA	Root/tuber crops with high starch or inulin conten
Solanum malinchense	Central America y Mexico	Root/tuber crops with high starch or inulin conten
Solanum marginatum	East Africa	Fruits and nuts
Solanum maternum	Andes	Fruits and nuts
Solanum parodii/chacoense	Andes	Root/tuber crops with high starch or inulin conten
Solanum pectinatum	Central America y Mexico	Fruits and nuts
Solanum peruvianum	Andes	Vegetables and melons
Solanum pimpinellifolium	Andes	Vegetables and melons
Solanum pseudolulo	Andes	Fruits and nuts
Solanum stenotomun	NA	Root/tuber crops with high starch or inulin conten
Solanum tuquerrense/andreanum	Andes	Root/tuber crops with high starch or inulin conten
Solanum unilobum	Andes	Fruits and nuts
Solanum vestissimum	Andes	Fruits and nuts
Citrus macrophylla	East Asia	Fruits and nuts
