# Supplementary material for: Prioritizing Colombian plant genetic resources for investment in research using indicators about the geographic origin, vulnerability status, economic benefits, and food security importance
Source: Biodivers Conserv. 2023 May 19;32(7):2221–61. doi: 10.1007/s10531-023-02599-7 (PMC10195663; doi:10.1007/s10531-023-02599-7)
Supplement: Supplementary file 2 — Supplementary file2 (XLSX 24 KB) [file 10531_2023_2599_MOESM2_ESM.xlsx]

## Sheet: Hoja2
Icon number	crop name in spanish	crop name in english	svg icon name	Scientific name	attribution	color icon
1	Palma Africana	African palm	elaeisguineensis	Elaeis guineensis	Icons made by <a href="https://www.flaticon.com/authors/freepik" title="Freepik">Freepik</a> from <a href="https://www.flaticon.com/" title="Flaticon"> www.flaticon.com</a>	Sonia Polo
2	Frutales Amazónicos	Amazonic fruits 1	bixaorellana	Bixa orellana	Xiomara Sarmiento	Sonia Polo
3	Frutales Amazónicos	Amazonic fruits 2	euterpesp	Euterpe catinga	Xiomara Sarmiento	Sonia Polo
3	Frutales Amazónicos	Amazonic fruits 2	euterpesp	Euterpe precatoria	Xiomara Sarmiento	Sonia Polo
4	Frutales Amazónicos	Amazonic fruits 3	eugeniaspitata	Eugenia spitata	Xiomara Sarmiento	Xiomara Sarmiento
4	Frutales Amazónicos	Amazonic fruits 3	eugeniaspitata	Euterpe oleracea	Xiomara Sarmiento	Xiomara Sarmiento
4	Frutales Amazónicos	Amazonic fruits 3	eugeniaspitata	Myrciaria dubia	Xiomara Sarmiento	Xiomara Sarmiento
5	Palma americana	American palm	elaeisoleifera	Elaeis oleifera	Icons made by <a href="https://www.flaticon.com/authors/freepik" title="Freepik">Freepik</a> from <a href="https://www.flaticon.com/" title="Flaticon"> www.flaticon.com</a>	Xiomara Sarmiento
6	Lupinus	Andean lupin 1	lupinussp	Lupinus mutabilis	Xiomara Sarmiento	Xiomara Sarmiento
7	Lupinus	Andean lupin 2	lupinussp	Lupinus angustifolius	Xiomara Sarmiento	Xiomara Sarmiento
7	Lupinus	Andean lupin 2	lupinussp	Lupinus luteus	Xiomara Sarmiento	Xiomara Sarmiento
8	Anonas	Annona 1	anonnamuricata	Anonna muricata	Icons made by <a href="https://www.flaticon.com/authors/pixelmeetup" title="Pixelmeetup">Pixelmeetup</a> from <a href="https://www.flaticon.com/" title="Flaticon"> www.flaticon.com</a>	Sonia Polo
9	Anonas	Anonna 2	anonnasp	Annona cherimola	Icons made by <a href="https://www.flaticon.com/authors/freepik" title="Freepik">Freepik</a> from <a href="https://www.flaticon.com/" title="Flaticon"> www.flaticon.com</a>	Sonia Polo
9	Anonas	Anonna 2	anonnasp	Annona glabra	Icons made by <a href="https://www.flaticon.com/authors/freepik" title="Freepik">Freepik</a> from <a href="https://www.flaticon.com/" title="Flaticon"> www.flaticon.com</a>	Sonia Polo
9	Anonas	Anonna 2	anonnasp	Annona purpurea	Icons made by <a href="https://www.flaticon.com/authors/freepik" title="Freepik">Freepik</a> from <a href="https://www.flaticon.com/" title="Flaticon"> www.flaticon.com</a>	Sonia Polo
9	Anonas	Anonna 2	anonnasp	Annona squamosa	Icons made by <a href="https://www.flaticon.com/authors/freepik" title="Freepik">Freepik</a> from <a href="https://www.flaticon.com/" title="Flaticon"> www.flaticon.com</a>	Sonia Polo
10	Aguacate	Avocado	perseasp	Persea americana	Icons made by <a href="https://www.flaticon.com/authors/smashicons" title="Smashicons">Smashicons</a> from <a href="https://www.flaticon.com/" title="Flaticon"> www.flaticon.com</a>	Sonia Polo
10	Aguacate	Avocado	perseasp	Persea caerulea	Icons made by <a href="https://www.flaticon.com/authors/smashicons" title="Smashicons">Smashicons</a> from <a href="https://www.flaticon.com/" title="Flaticon"> www.flaticon.com</a>	Sonia Polo
11	Cebada	Barley	hordeumvulgare	Hordeum vulgare	Icons made by <a href="https://www.flaticon.com/authors/freepik" title="Freepik">Freepik</a> from <a href="https://www.flaticon.com/" title="Flaticon"> www.flaticon.com</a>	Xiomara Sarmiento
12	Frijol	Bean	phaseolussp	Phaseolus coccineus	Icons made by <a href="https://www.flaticon.com/authors/freepik" title="Freepik">Freepik</a> from <a href="https://www.flaticon.com/" title="Flaticon"> www.flaticon.com</a>	Sonia Polo
12	Frijol	Bean	phaseolussp	Phaseolus lunatus	Icons made by <a href="https://www.flaticon.com/authors/freepik" title="Freepik">Freepik</a> from <a href="https://www.flaticon.com/" title="Flaticon"> www.flaticon.com</a>	Sonia Polo
12	Frijol	Bean	phaseolussp	Phaseolus vulgaris	Icons made by <a href="https://www.flaticon.com/authors/freepik" title="Freepik">Freepik</a> from <a href="https://www.flaticon.com/" title="Flaticon"> www.flaticon.com</a>	Sonia Polo
13	Mora	Blackberry 1	rubussp1	Rubus floribundus	Icons made by <a href="https://www.flaticon.com/authors/freepik" title="Freepik">Freepik</a> from <a href="https://www.flaticon.com/" title="Flaticon"> www.flaticon.com</a>	Sonia Polo
13	Mora	Blackberry 1	rubussp1	Rubus glaucus	Icons made by <a href="https://www.flaticon.com/authors/freepik" title="Freepik">Freepik</a> from <a href="https://www.flaticon.com/" title="Flaticon"> www.flaticon.com</a>	Sonia Polo
13	Mora	Blackberry 1	rubussp1	Rubus urticifolius	Icons made by <a href="https://www.flaticon.com/authors/freepik" title="Freepik">Freepik</a> from <a href="https://www.flaticon.com/" title="Flaticon"> www.flaticon.com</a>	Sonia Polo
14	Mora	Blackberry 2	rubussp2	Rubus idaeus	Icons made by <a href="https://www.flaticon.com/authors/freepik" title="Freepik">Freepik</a> from <a href="https://www.flaticon.com/" title="Flaticon"> www.flaticon.com</a>	Sonia Polo
14	Mora	Blackberry 2	rubussp2	Rubus niveus	Icons made by <a href="https://www.flaticon.com/authors/freepik" title="Freepik">Freepik</a> from <a href="https://www.flaticon.com/" title="Flaticon"> www.flaticon.com</a>	Sonia Polo
15	Marañón	Cashew	anacardiumoccidentale	Anacardium occidentale	Icons made by <a href="https://www.flaticon.com/authors/eucalyp" title="Eucalyp">Eucalyp</a> from <a href="https://www.flaticon.com/" title="Flaticon">www.flaticon.com</a>	Sonia Polo
16	Higuerilla	Castor bean	ricinuscommunis	Ricinus communis	Xiomara Sarmiento	Xiomara Sarmiento
17	Cítricos	Citrus	citrussp	Citrus amblycarpa	Icons made by <a href="https://www.flaticon.com/authors/monkik" title="monkik">monkik</a> from <a href="https://www.flaticon.com/" title="Flaticon">www.flaticon.com</a>	Sonia Polo
17	Cítricos	Citrus	citrussp	Citrus aurantiifolia	Icons made by <a href="https://www.flaticon.com/authors/monkik" title="monkik">monkik</a> from <a href="https://www.flaticon.com/" title="Flaticon">www.flaticon.com</a>	Sonia Polo
17	Cítricos	Citrus	citrussp	Citrus aurantium	Icons made by <a href="https://www.flaticon.com/authors/monkik" title="monkik">monkik</a> from <a href="https://www.flaticon.com/" title="Flaticon">www.flaticon.com</a>	Sonia Polo
17	Cítricos	Citrus	citrussp	Citrus clementina	Icons made by <a href="https://www.flaticon.com/authors/monkik" title="monkik">monkik</a> from <a href="https://www.flaticon.com/" title="Flaticon">www.flaticon.com</a>	Sonia Polo
17	Cítricos	Citrus	citrussp	Citrus excelsa	Icons made by <a href="https://www.flaticon.com/authors/monkik" title="monkik">monkik</a> from <a href="https://www.flaticon.com/" title="Flaticon">www.flaticon.com</a>	Sonia Polo
17	Cítricos	Citrus	citrussp	Citrus grandis	Icons made by <a href="https://www.flaticon.com/authors/monkik" title="monkik">monkik</a> from <a href="https://www.flaticon.com/" title="Flaticon">www.flaticon.com</a>	Sonia Polo
17	Cítricos	Citrus	citrussp	Citrus jambhiri/Citrus taitensis	Icons made by <a href="https://www.flaticon.com/authors/monkik" title="monkik">monkik</a> from <a href="https://www.flaticon.com/" title="Flaticon">www.flaticon.com</a>	Sonia Polo
17	Cítricos	Citrus	citrussp	Citrus japonica	Icons made by <a href="https://www.flaticon.com/authors/monkik" title="monkik">monkik</a> from <a href="https://www.flaticon.com/" title="Flaticon">www.flaticon.com</a>	Sonia Polo
17	Cítricos	Citrus	citrussp	Citrus latifolia	Icons made by <a href="https://www.flaticon.com/authors/monkik" title="monkik">monkik</a> from <a href="https://www.flaticon.com/" title="Flaticon">www.flaticon.com</a>	Sonia Polo
17	Cítricos	Citrus	citrussp	Citrus limon	Icons made by <a href="https://www.flaticon.com/authors/monkik" title="monkik">monkik</a> from <a href="https://www.flaticon.com/" title="Flaticon">www.flaticon.com</a>	Sonia Polo
17	Cítricos	Citrus	citrussp	Citrus lycopersicae	Icons made by <a href="https://www.flaticon.com/authors/monkik" title="monkik">monkik</a> from <a href="https://www.flaticon.com/" title="Flaticon">www.flaticon.com</a>	Sonia Polo
17	Cítricos	Citrus	citrussp	Citrus medica	Icons made by <a href="https://www.flaticon.com/authors/monkik" title="monkik">monkik</a> from <a href="https://www.flaticon.com/" title="Flaticon">www.flaticon.com</a>	Sonia Polo
17	Cítricos	Citrus	citrussp	Citrus natsudaidai	Icons made by <a href="https://www.flaticon.com/authors/monkik" title="monkik">monkik</a> from <a href="https://www.flaticon.com/" title="Flaticon">www.flaticon.com</a>	Sonia Polo
17	Cítricos	Citrus	citrussp	Citrus paradisi	Icons made by <a href="https://www.flaticon.com/authors/monkik" title="monkik">monkik</a> from <a href="https://www.flaticon.com/" title="Flaticon">www.flaticon.com</a>	Sonia Polo
17	Cítricos	Citrus	citrussp	Citrus reticulata	Icons made by <a href="https://www.flaticon.com/authors/monkik" title="monkik">monkik</a> from <a href="https://www.flaticon.com/" title="Flaticon">www.flaticon.com</a>	Sonia Polo
17	Cítricos	Citrus	citrussp	Citrus sinensis	Icons made by <a href="https://www.flaticon.com/authors/monkik" title="monkik">monkik</a> from <a href="https://www.flaticon.com/" title="Flaticon">www.flaticon.com</a>	Sonia Polo
17	Cítricos	Citrus	citrussp	Citrus volkameriana	Icons made by <a href="https://www.flaticon.com/authors/monkik" title="monkik">monkik</a> from <a href="https://www.flaticon.com/" title="Flaticon">www.flaticon.com</a>	Sonia Polo
17	Cítricos	Citrus	citrussp	Citrus webberii	Icons made by <a href="https://www.flaticon.com/authors/monkik" title="monkik">monkik</a> from <a href="https://www.flaticon.com/" title="Flaticon">www.flaticon.com</a>	Sonia Polo
17	Cítricos	Citrus	citrussp	Clausena lansium	Icons made by <a href="https://www.flaticon.com/authors/monkik" title="monkik">monkik</a> from <a href="https://www.flaticon.com/" title="Flaticon">www.flaticon.com</a>	Sonia Polo
17	Cítricos	Citrus	citrussp	Citrus macrophylla	Icons made by <a href="https://www.flaticon.com/authors/monkik" title="monkik">monkik</a> from <a href="https://www.flaticon.com/" title="Flaticon">www.flaticon.com</a>	Sonia Polo
17	Cítricos	Citrus	citrussp	Poncirus trifoliata	Icons made by <a href="https://www.flaticon.com/authors/monkik" title="monkik">monkik</a> from <a href="https://www.flaticon.com/" title="Flaticon">www.flaticon.com</a>	Sonia Polo
18	Cacao	Cocoa nuts 1	theobromacacao	Theobroma cacao	Icons made by <a href="https://www.flaticon.com/authors/vitaly-gorbachev" title="Vitaly Gorbachev">Vitaly Gorbachev</a> from <a href="https://www.flaticon.com/" title="Flaticon">www.flaticon.com</a>	Xiomara Sarmiento
19	Cacao	Cocoa nuts 2	theobromabicolor	Theobroma bicolor	Icons made by <a href="https://www.flaticon.com/authors/vitaly-gorbachev" title="Vitaly Gorbachev">Vitaly Gorbachev</a> from <a href="https://www.flaticon.com/" title="Flaticon">www.flaticon.com</a>	Sonia Polo
20	Cacao	Cocoa fruit	theobromagrandiflorum	Theobroma grandiflorum	Icons made by <a href="https://www.flaticon.com/authors/surang" title="surang">surang</a> from <a href="https://www.flaticon.com/" title="Flaticon">www.flaticon.com</a>	Sonia Polo
21	Coco	coconut	cocosnucifera	Cocos nucifera	Icons made by <a href="https://www.flaticon.com/authors/freepik" title="Freepik">Freepik</a> from <a href="https://www.flaticon.com/" title="Flaticon">www.flaticon.com</a>	Xiomara Sarmiento
22	Maíz	Corn	zeamays	Zea mays	Icons made by <a href="https://www.flaticon.com/authors/smashicons" title="Smashicons">Smashicons</a> from <a href="https://www.flaticon.com/" title="Flaticon">www.flaticon.com</a>	Sonia Polo
23	Algodón	Cotton 1	gossypiumsp	Gossypium barbadense	Icons made by <a href="https://www.flaticon.com/authors/smashicons" title="Smashicons">Smashicons</a> from <a href="https://www.flaticon.com/" title="Flaticon">www.flaticon.com</a>	Xiomara Sarmiento
23	Algodón	Cotton 1	gossypiumsp	Gossypium hirsutum	Icons made by <a href="https://www.flaticon.com/authors/smashicons" title="Smashicons">Smashicons</a> from <a href="https://www.flaticon.com/" title="Flaticon">www.flaticon.com</a>	Xiomara Sarmiento
24	Algodón	Cotton 2	gossypiumarboreum	Gossypium arboreum	Icons made by <a href="https://www.flaticon.com/authors/smashicons" title="Smashicons">Smashicons</a> from <a href="https://www.flaticon.com/" title="Flaticon">www.flaticon.com</a>	Xiomara Sarmiento
25	Caupí	Cowpea	vignaunguiculata	Vigna unguiculata	Xiomara Sarmiento	Xiomara Sarmiento
26	Cucurbitáceas	Cucurbit 1	cucurbitamaxima	Cucurbita ficifolia	Icons made by <a href="https://www.flaticon.com/authors/smashicons" title="Smashicons">Smashicons</a> from <a href="https://www.flaticon.com/" title="Flaticon">www.flaticon.com</a>	Sonia Polo
26	Cucurbitáceas	Cucurbit 1	cucurbitamaxima	Cucurbita maxima	Icons made by <a href="https://www.flaticon.com/authors/smashicons" title="Smashicons">Smashicons</a> from <a href="https://www.flaticon.com/" title="Flaticon">www.flaticon.com</a>	Sonia Polo
26	Cucurbitáceas	Cucurbit 1	cucurbitamaxima	Sicana odorifera	Icons made by <a href="https://www.flaticon.com/authors/smashicons" title="Smashicons">Smashicons</a> from <a href="https://www.flaticon.com/" title="Flaticon">www.flaticon.com</a>	Sonia Polo
27	Cucurbitáceas	Cucurbit 2	cucurbitasp	Cucurbita moschata	Icons made by <a href="https://www.flaticon.com/authors/freepik" title="Freepik">Freepik</a> from <a href="https://www.flaticon.com/" title="Flaticon">www.flaticon.com</a>	Sonia Polo
27	Cucurbitáceas	Cucurbit 2	cucurbitasp	Cucurbita pepo	Icons made by <a href="https://www.flaticon.com/authors/freepik" title="Freepik">Freepik</a> from <a href="https://www.flaticon.com/" title="Flaticon">www.flaticon.com</a>	Sonia Polo
27	Cucurbitáceas	Cucurbit 2	cucurbitasp	Cyclanthera pedata	Icons made by <a href="https://www.flaticon.com/authors/freepik" title="Freepik">Freepik</a> from <a href="https://www.flaticon.com/" title="Flaticon">www.flaticon.com</a>	Sonia Polo
28	Berenjena	Eggplant	solanummelongena	Solanum melongena	Icons made by <a href="https://www.flaticon.com/authors/freepik" title="Freepik">Freepik</a> from <a href="https://www.flaticon.com/" title="Flaticon">www.flaticon.com</a>	Sonia Polo
29	Haba	Faba bean	viciafaba	Vicia faba	Xiomara Sarmiento	Xiomara Sarmiento
30	Forestales	Forest	caryodendronorinocense	Caryodendron orinocense	Xiomara Sarmiento	Xiomara Sarmiento
30	Forestales	Forest	caryodendronorinocense	Hibiscus elatus	Xiomara Sarmiento	Xiomara Sarmiento
30	Forestales	Forest	caryodendronorinocense	Pachira aquatica	Xiomara Sarmiento	Xiomara Sarmiento
31	Ajo	Garlic	alliumsativum	Allium sativum	Icons made by <a href="https://www.flaticon.com/authors/smashicons" title="Smashicons">Smashicons</a> from <a href="https://www.flaticon.com/" title="Flaticon">www.flaticon.com</a>	Sonia Polo
32	Uchuva	Golden berry 1	physalissp1	Physalis coztomatl	Xiomara Sarmiento	Xiomara Sarmiento
32	Uchuva	Golden berry 1	physalissp1	Physalis peruviana	Xiomara Sarmiento	Xiomara Sarmiento
32	Uchuva	Golden berry 1	physalissp1	Physalis viscosa	Xiomara Sarmiento	Xiomara Sarmiento
33	Uchuva	Golden berry 2	physalissp2	Physalis aequata* Physalis ixocarpa	Xiomara Sarmiento	Xiomara Sarmiento
33	Uchuva	Golden berry 2	physalissp2	Physalis alkekengi	Xiomara Sarmiento	Xiomara Sarmiento
33	Uchuva	Golden berry 2	physalissp2	Physalis angulata	Xiomara Sarmiento	Xiomara Sarmiento
33	Uchuva	Golden berry 2	physalissp2	Physalis floridana*Physalis pubescens	Xiomara Sarmiento	Xiomara Sarmiento
33	Uchuva	Golden berry 2	physalissp2	Physalis fuscomaculata	Xiomara Sarmiento	Xiomara Sarmiento
33	Uchuva	Golden berry 2	physalissp2	Physalis mendocina	Xiomara Sarmiento	Xiomara Sarmiento
33	Uchuva	Golden berry 2	physalissp2	Physalis mexicana	Xiomara Sarmiento	Xiomara Sarmiento
33	Uchuva	Golden berry 2	physalissp2	Physalis philadelphica	Xiomara Sarmiento	Xiomara Sarmiento
33	Uchuva	Golden berry 2	physalissp2	Physalis pruinosa	Xiomara Sarmiento	Xiomara Sarmiento
34	Uchuva	Golden berry 3	nicandraphysalodes	Nicandra physalodes	Xiomara Sarmiento	Xiomara Sarmiento
35	Pastos y forrajes	Grasses and forages 1	canavaliaensiformis	Canavalia ensiformis	Xiomara Sarmiento	Xiomara Sarmiento
35	Pastos y forrajes	Grasses and forages 1	canavaliaensiformis	Mucuna deeringiana	Xiomara Sarmiento	Xiomara Sarmiento
36	Pastos y forrajes	Grasses and forages 2	crotalariasp	Calopogonium mucunoides	Icons made by <a href="https://www.flaticon.com/authors/good-ware" title="Good Ware">Good Ware</a> from <a href="https://www.flaticon.com/" title="Flaticon">www.flaticon.com</a>	Sonia Polo
36	Pastos y forrajes	Grasses and forages 2	crotalariasp	Crotalaria anagyroides	Icons made by <a href="https://www.flaticon.com/authors/good-ware" title="Good Ware">Good Ware</a> from <a href="https://www.flaticon.com/" title="Flaticon">www.flaticon.com</a>	Sonia Polo
36	Pastos y forrajes	Grasses and forages 2	crotalariasp	Crotalaria juncea	Icons made by <a href="https://www.flaticon.com/authors/good-ware" title="Good Ware">Good Ware</a> from <a href="https://www.flaticon.com/" title="Flaticon">www.flaticon.com</a>	Sonia Polo
36	Pastos y forrajes	Grasses and forages 2	crotalariasp	Crotalaria lanceolata	Icons made by <a href="https://www.flaticon.com/authors/good-ware" title="Good Ware">Good Ware</a> from <a href="https://www.flaticon.com/" title="Flaticon">www.flaticon.com</a>	Sonia Polo
36	Pastos y forrajes	Grasses and forages 2	crotalariasp	Crotalaria ochroleuca	Icons made by <a href="https://www.flaticon.com/authors/good-ware" title="Good Ware">Good Ware</a> from <a href="https://www.flaticon.com/" title="Flaticon">www.flaticon.com</a>	Sonia Polo
36	Pastos y forrajes	Grasses and forages 2	crotalariasp	Crotalaria retusa	Icons made by <a href="https://www.flaticon.com/authors/good-ware" title="Good Ware">Good Ware</a> from <a href="https://www.flaticon.com/" title="Flaticon">www.flaticon.com</a>	Sonia Polo
36	Pastos y forrajes	Grasses and forages 2	crotalariasp	Crotalaria spectabilis	Icons made by <a href="https://www.flaticon.com/authors/good-ware" title="Good Ware">Good Ware</a> from <a href="https://www.flaticon.com/" title="Flaticon">www.flaticon.com</a>	Sonia Polo
36	Pastos y forrajes	Grasses and forages 2	crotalariasp	Crotalaria striata	Icons made by <a href="https://www.flaticon.com/authors/good-ware" title="Good Ware">Good Ware</a> from <a href="https://www.flaticon.com/" title="Flaticon">www.flaticon.com</a>	Sonia Polo
36	Pastos y forrajes	Grasses and forages 2	crotalariasp	Leucaena leucocephala	Icons made by <a href="https://www.flaticon.com/authors/good-ware" title="Good Ware">Good Ware</a> from <a href="https://www.flaticon.com/" title="Flaticon">www.flaticon.com</a>	Sonia Polo
36	Pastos y forrajes	Grasses and forages 2	crotalariasp	Stylosanthes guianensis	Icons made by <a href="https://www.flaticon.com/authors/good-ware" title="Good Ware">Good Ware</a> from <a href="https://www.flaticon.com/" title="Flaticon">www.flaticon.com</a>	Sonia Polo
37	Guayaba	Guava	psidiumsp	Psidium guajava	Icons made by <a href="https://www.flaticon.com/authors/freepik" title="Freepik">Freepik</a> from <a href="https://www.flaticon.com/" title="Flaticon">www.flaticon.com</a>	Sonia Polo
37	Guayaba	Guava	psidiumsp	Psidium friedrichstahlianum	Icons made by <a href="https://www.flaticon.com/authors/freepik" title="Freepik">Freepik</a> from <a href="https://www.flaticon.com/" title="Flaticon">www.flaticon.com</a>	Sonia Polo
38	Achira	Indian shot	cannaindica	Canna indica	Xiomara Sarmiento	Xiomara Sarmiento
39	Lulo	Lulo	solanumsplulo	Solanum pseudolulo	Xiomara Sarmiento	Xiomara Sarmiento
39	Lulo	Lulo	solanumsplulo	Solanum quitoense	Xiomara Sarmiento	Xiomara Sarmiento
39	Lulo	Lulo	solanumsplulo	Solanum saponaceum	Xiomara Sarmiento	Xiomara Sarmiento
39	Lulo	Lulo	solanumsplulo	Solanum sessiliflorum	Xiomara Sarmiento	Xiomara Sarmiento
39	Lulo	Lulo	solanumsplulo	Solanum vestissimum	Xiomara Sarmiento	Xiomara Sarmiento
39	Lulo	Lulo	solanumsplulo	Solanum ferox	Xiomara Sarmiento	Xiomara Sarmiento
39	Lulo	Lulo	solanumsplulo	Solanum hirtum	Xiomara Sarmiento	Xiomara Sarmiento
39	Lulo	Lulo	solanumsplulo	Solanum pectinatum	Xiomara Sarmiento	Xiomara Sarmiento
39	Lulo	Lulo	solanumsplulo	Solanum atropurpureum	Xiomara Sarmiento	Xiomara Sarmiento
39	Lulo	Lulo	solanumsplulo	Solanum capsicoides	Xiomara Sarmiento	Xiomara Sarmiento
39	Lulo	Lulo	solanumsplulo	Solanum caripense	Xiomara Sarmiento	Xiomara Sarmiento
39	Lulo	Lulo	solanumsplulo	Solanum mammosum	Xiomara Sarmiento	Xiomara Sarmiento
39	Lulo	Lulo	solanumsplulo	Solanum jamaicense	Xiomara Sarmiento	Xiomara Sarmiento
39	Lulo	Lulo	solanumsplulo	Solanum marginatum	Xiomara Sarmiento	Xiomara Sarmiento
40	Mango	Mango	mangiferaindica	Mangifera indica	Icons made by <a href="https://www.flaticon.com/authors/freepik" title="Freepik">Freepik</a> from <a href="https://www.flaticon.com/" title="Flaticon">www.flaticon.com</a>	Sonia Polo
41	Millo	Millet	penissetumglaucum	Panicum miliaceum	Xiomara Sarmiento	Xiomara Sarmiento
41	Millo	Millet	penissetumglaucum	Pennisetum glaucum* Cenchrus americanus	Xiomara Sarmiento	Xiomara Sarmiento
42	Frutales menores	Minor fruits 1	alibertiapatinoi	Alibertia patinoi	Xiomara Sarmiento	Xiomara Sarmiento
42	Frutales menores	Minor fruits 1	alibertiapatinoi	Chrysophyllum cainito	Xiomara Sarmiento	Xiomara Sarmiento
42	Frutales menores	Minor fruits 1	alibertiapatinoi	Eugenia uniflora L.	Xiomara Sarmiento	Xiomara Sarmiento
42	Frutales menores	Minor fruits 1	alibertiapatinoi	Genipa americana	Xiomara Sarmiento	Xiomara Sarmiento
42	Frutales menores	Minor fruits 1	alibertiapatinoi	Inga spectabilis	Xiomara Sarmiento	Xiomara Sarmiento
42	Frutales menores	Minor fruits 1	alibertiapatinoi	Pouteria caimito	Xiomara Sarmiento	Xiomara Sarmiento
43	Frutales menores	Minor fruits 2	averrhoacarambola	Artocarpus altilis	Xiomara Sarmiento	Xiomara Sarmiento
43	Frutales menores	Minor fruits 2	averrhoacarambola	Artocarpus heterophyllus	Xiomara Sarmiento	Xiomara Sarmiento
43	Frutales menores	Minor fruits 2	averrhoacarambola	Averrhoa carambola	Xiomara Sarmiento	Xiomara Sarmiento
43	Frutales menores	Minor fruits 2	averrhoacarambola	Campomanesia lineatifolia	Xiomara Sarmiento	Xiomara Sarmiento
43	Frutales menores	Minor fruits 2	averrhoacarambola	Casimiroa edulis	Xiomara Sarmiento	Xiomara Sarmiento
43	Frutales menores	Minor fruits 2	averrhoacarambola	Casimiroa tetrameria	Xiomara Sarmiento	Xiomara Sarmiento
43	Frutales menores	Minor fruits 2	averrhoacarambola	Coccoloba uvifera	Xiomara Sarmiento	Xiomara Sarmiento
43	Frutales menores	Minor fruits 2	averrhoacarambola	Cucumis melo	Xiomara Sarmiento	Xiomara Sarmiento
43	Frutales menores	Minor fruits 2	averrhoacarambola	Dillenia indica	Xiomara Sarmiento	Xiomara Sarmiento
43	Frutales menores	Minor fruits 2	averrhoacarambola	Diospyros discolor	Xiomara Sarmiento	Xiomara Sarmiento
43	Frutales menores	Minor fruits 2	averrhoacarambola	Dovyalis hebecarpa	Xiomara Sarmiento	Xiomara Sarmiento
43	Frutales menores	Minor fruits 2	averrhoacarambola	Eriobotrya japonica	Xiomara Sarmiento	Xiomara Sarmiento
43	Frutales menores	Minor fruits 2	averrhoacarambola	Ficus carica	Xiomara Sarmiento	Xiomara Sarmiento
43	Frutales menores	Minor fruits 2	averrhoacarambola	Flacourtia indica	Xiomara Sarmiento	Xiomara Sarmiento
43	Frutales menores	Minor fruits 2	averrhoacarambola	Garcinia dulcis	Xiomara Sarmiento	Xiomara Sarmiento
43	Frutales menores	Minor fruits 2	averrhoacarambola	Garcinia macrophylla	Xiomara Sarmiento	Xiomara Sarmiento
43	Frutales menores	Minor fruits 2	averrhoacarambola	Garcinia madrunno	Xiomara Sarmiento	Xiomara Sarmiento
43	Frutales menores	Minor fruits 2	averrhoacarambola	Garcinia mangostana	Xiomara Sarmiento	Xiomara Sarmiento
43	Frutales menores	Minor fruits 2	averrhoacarambola	Litchi chinensis	Xiomara Sarmiento	Xiomara Sarmiento
43	Frutales menores	Minor fruits 2	averrhoacarambola	Malpighia glabra	Xiomara Sarmiento	Xiomara Sarmiento
43	Frutales menores	Minor fruits 2	averrhoacarambola	Malpighia punicifolia	Xiomara Sarmiento	Xiomara Sarmiento
43	Frutales menores	Minor fruits 2	averrhoacarambola	Mammea americana	Xiomara Sarmiento	Xiomara Sarmiento
43	Frutales menores	Minor fruits 2	averrhoacarambola	Manilkara zapota	Xiomara Sarmiento	Xiomara Sarmiento
43	Frutales menores	Minor fruits 2	averrhoacarambola	Matisia cordata	Xiomara Sarmiento	Xiomara Sarmiento
43	Frutales menores	Minor fruits 2	averrhoacarambola	Melicoccus bijugatus	Xiomara Sarmiento	Xiomara Sarmiento
43	Frutales menores	Minor fruits 2	averrhoacarambola	Myrciaria cauliflora	Xiomara Sarmiento	Xiomara Sarmiento
43	Frutales menores	Minor fruits 2	averrhoacarambola	Patinoa almirajo	Xiomara Sarmiento	Xiomara Sarmiento
43	Frutales menores	Minor fruits 2	averrhoacarambola	Phyllanthus acidus	Xiomara Sarmiento	Xiomara Sarmiento
43	Frutales menores	Minor fruits 2	averrhoacarambola	Pouteria campechiana	Xiomara Sarmiento	Xiomara Sarmiento
43	Frutales menores	Minor fruits 2	averrhoacarambola	Pouteria lucuma	Xiomara Sarmiento	Xiomara Sarmiento
43	Frutales menores	Minor fruits 2	averrhoacarambola	Punica granatum	Xiomara Sarmiento	Xiomara Sarmiento
43	Frutales menores	Minor fruits 2	averrhoacarambola	Spondias purpurea	Xiomara Sarmiento	Xiomara Sarmiento
43	Frutales menores	Minor fruits 2	averrhoacarambola	Spondias tuberosa	Xiomara Sarmiento	Xiomara Sarmiento
43	Frutales menores	Minor fruits 2	averrhoacarambola	Synsepalum dulcificum	Xiomara Sarmiento	Xiomara Sarmiento
43	Frutales menores	Minor fruits 2	averrhoacarambola	Syzygium jambos	Xiomara Sarmiento	Xiomara Sarmiento
43	Frutales menores	Minor fruits 2	averrhoacarambola	Syzygium malaccense	Xiomara Sarmiento	Xiomara Sarmiento
43	Frutales menores	Minor fruits 2	averrhoacarambola	Tamarindus indica	Xiomara Sarmiento	Xiomara Sarmiento
43	Frutales menores	Minor fruits 2	averrhoacarambola	Ziziphus mauritiana	Xiomara Sarmiento	Xiomara Sarmiento
43	Frutales menores	Minor fruits 2	averrhoacarambola	Zizyphus jujuba	Xiomara Sarmiento	Xiomara Sarmiento
44	Frutales menores	Minor fruits 3	lecythisminor	Blighia sapida	Xiomara Sarmiento	Xiomara Sarmiento
44	Frutales menores	Minor fruits 3	lecythisminor	Gustavia superba	Xiomara Sarmiento	Xiomara Sarmiento
44	Frutales menores	Minor fruits 3	lecythisminor	Hymenaea courbaril	Xiomara Sarmiento	Xiomara Sarmiento
44	Frutales menores	Minor fruits 3	lecythisminor	Lecythis minor	Xiomara Sarmiento	Xiomara Sarmiento
44	Frutales menores	Minor fruits 3	lecythisminor	Macadamia integrifolia	Xiomara Sarmiento	Xiomara Sarmiento
44	Frutales menores	Minor fruits 3	lecythisminor	Macadamia tetraphylla	Xiomara Sarmiento	Xiomara Sarmiento
44	Frutales menores	Minor fruits 3	lecythisminor	Morinda citrifolia	Xiomara Sarmiento	Xiomara Sarmiento
44	Frutales menores	Minor fruits 3	lecythisminor	Moringa oleifera	Xiomara Sarmiento	Xiomara Sarmiento
44	Frutales menores	Minor fruits 3	lecythisminor	Sterculia apetala	Xiomara Sarmiento	Xiomara Sarmiento
44	Frutales menores	Minor fruits 3	lecythisminor	Tabernaemontana heyneana	Xiomara Sarmiento	Xiomara Sarmiento
44	Frutales menores	Minor fruits 3	lecythisminor	Terminalia catappa	Xiomara Sarmiento	Xiomara Sarmiento
45	Mungo	Moong	vignaradiata	Vigna radiata	Xiomara Sarmiento	Xiomara Sarmiento
46	Musaceas	Musa 1	musasp1	Musa acuminata	Icons made by <a href="https://www.flaticon.com/authors/freepik" title="Freepik">Freepik</a> from <a href="https://www.flaticon.com/" title="Flaticon">www.flaticon.com</a>	Sonia Polo
46	Musaceas	Musa 1	musasp1	Musa balbisiana	Icons made by <a href="https://www.flaticon.com/authors/freepik" title="Freepik">Freepik</a> from <a href="https://www.flaticon.com/" title="Flaticon">www.flaticon.com</a>	Sonia Polo
47	Musaceas	Musa 2	musasp2	Musa basjoo	Icons made by <a href="https://www.flaticon.com/authors/freepik" title="Freepik">Freepik</a> from <a href="https://www.flaticon.com/" title="Flaticon">www.flaticon.com</a>	Xiomara Sarmiento
47	Musaceas	Musa 2	musasp2	Musa coccinea	Icons made by <a href="https://www.flaticon.com/authors/freepik" title="Freepik">Freepik</a> from <a href="https://www.flaticon.com/" title="Flaticon">www.flaticon.com</a>	Xiomara Sarmiento
47	Musaceas	Musa 2	musasp2	Musa itinerans	Icons made by <a href="https://www.flaticon.com/authors/freepik" title="Freepik">Freepik</a> from <a href="https://www.flaticon.com/" title="Flaticon">www.flaticon.com</a>	Xiomara Sarmiento
47	Musaceas	Musa 2	musasp2	Musa laterita	Icons made by <a href="https://www.flaticon.com/authors/freepik" title="Freepik">Freepik</a> from <a href="https://www.flaticon.com/" title="Flaticon">www.flaticon.com</a>	Xiomara Sarmiento
47	Musaceas	Musa 2	musasp2	Musa ornata	Icons made by <a href="https://www.flaticon.com/authors/freepik" title="Freepik">Freepik</a> from <a href="https://www.flaticon.com/" title="Flaticon">www.flaticon.com</a>	Xiomara Sarmiento
47	Musaceas	Musa 2	musasp2	Musa textilis	Icons made by <a href="https://www.flaticon.com/authors/freepik" title="Freepik">Freepik</a> from <a href="https://www.flaticon.com/" title="Flaticon">www.flaticon.com</a>	Xiomara Sarmiento
47	Musaceas	Musa 2	musasp2	Musa velutina	Icons made by <a href="https://www.flaticon.com/authors/freepik" title="Freepik">Freepik</a> from <a href="https://www.flaticon.com/" title="Flaticon">www.flaticon.com</a>	Xiomara Sarmiento
48	Avena	Oat	avenasativa	Avena sativa	Xiomara Sarmiento	Xiomara Sarmiento
49	Cebolla	Onion	alliumcepa	Allium cepa	Icons made by <a href="https://www.flaticon.com/authors/freepik" title="Freepik">Freepik</a> from <a href="https://www.flaticon.com/" title="Flaticon">www.flaticon.com</a>	Sonia Polo
50	Papaya	Papaya	caricapapaya	Carica papaya	Icons made by <a href="https://www.flaticon.com/authors/freepik" title="Freepik">Freepik</a> from <a href="https://www.flaticon.com/" title="Flaticon">www.flaticon.com</a>	Sonia Polo
51	Passifloras	Passiflora 1	passiflorasp1	Passiflora cumbalensis	Xiomara Sarmiento	Xiomara Sarmiento
51	Passifloras	Passiflora 1	passiflorasp1	Passiflora edulis	Xiomara Sarmiento	Xiomara Sarmiento
51	Passifloras	Passiflora 1	passiflorasp1	Passiflora jardinensis	Xiomara Sarmiento	Xiomara Sarmiento
51	Passifloras	Passiflora 1	passiflorasp1	Passiflora ligularis	Xiomara Sarmiento	Xiomara Sarmiento
51	Passifloras	Passiflora 1	passiflorasp1	Passiflora tarminiana	Xiomara Sarmiento	Xiomara Sarmiento
52	Passifloras	Passiflora 2	passiflorasp2	Passiflora adenopoda	Xiomara Sarmiento	Xiomara Sarmiento
52	Passifloras	Passiflora 2	passiflorasp2	Passiflora alata	Xiomara Sarmiento	Xiomara Sarmiento
52	Passifloras	Passiflora 2	passiflorasp2	Passiflora alnifolia	Xiomara Sarmiento	Xiomara Sarmiento
52	Passifloras	Passiflora 2	passiflorasp2	Passiflora antioquiensis	Xiomara Sarmiento	Xiomara Sarmiento
52	Passifloras	Passiflora 2	passiflorasp2	Passiflora apoda	Xiomara Sarmiento	Xiomara Sarmiento
52	Passifloras	Passiflora 2	passiflorasp2	Passiflora foetida	Xiomara Sarmiento	Xiomara Sarmiento
52	Passifloras	Passiflora 2	passiflorasp2	Passiflora gracilis	Xiomara Sarmiento	Xiomara Sarmiento
52	Passifloras	Passiflora 2	passiflorasp2	Passiflora hahnii	Xiomara Sarmiento	Xiomara Sarmiento
52	Passifloras	Passiflora 2	passiflorasp2	Passiflora laurifolia	Xiomara Sarmiento	Xiomara Sarmiento
52	Passifloras	Passiflora 2	passiflorasp2	Passiflora maliformis	Xiomara Sarmiento	Xiomara Sarmiento
52	Passifloras	Passiflora 2	passiflorasp2	Passiflora manicata	Xiomara Sarmiento	Xiomara Sarmiento
52	Passifloras	Passiflora 2	passiflorasp2	Passiflora mixta	Xiomara Sarmiento	Xiomara Sarmiento
52	Passifloras	Passiflora 2	passiflorasp2	Passiflora mollissima	Xiomara Sarmiento	Xiomara Sarmiento
52	Passifloras	Passiflora 2	passiflorasp2	Passiflora pinnatistipula	Xiomara Sarmiento	Xiomara Sarmiento
52	Passifloras	Passiflora 2	passiflorasp2	Passiflora sanguinolenta	Xiomara Sarmiento	Xiomara Sarmiento
52	Passifloras	Passiflora 2	passiflorasp2	Passiflora tiliifolia	Xiomara Sarmiento	Xiomara Sarmiento
52	Passifloras	Passiflora 2	passiflorasp2	passiflora tripartita	Xiomara Sarmiento	Xiomara Sarmiento
52	Passifloras	Passiflora 2	passiflorasp2	Passiflora vitifolia	Xiomara Sarmiento	Xiomara Sarmiento
53	Arveja	Pea	pisumsativum	Pisum sativum	Icons made by <a href="https://www.flaticon.com/authors/freepik" title="Freepik">Freepik</a> from <a href="https://www.flaticon.com/" title="Flaticon">www.flaticon.com</a>	Sonia Polo
54	Chontaduro	Peach palm	bactrisgasipaes	Bactris gasipaes	Xiomara Sarmiento	Xiomara Sarmiento
55	Mani	Peanut	arachishypogaea	Arachis hypogaea	Icons made by <a href="https://www.flaticon.com/authors/freepik" title="Freepik">Freepik</a> from <a href="https://www.flaticon.com/" title="Flaticon">www.flaticon.com</a>	Sonia Polo
56	Ají	Pepper 1	capsicumsp1	Capsicum abbreviatum	Icons made by <a href="https://www.flaticon.com/authors/smashicons" title="Smashicons">Smashicons</a> from <a href="https://www.flaticon.com/" title="Flaticon">www.flaticon.com</a>	Sonia Polo
56	Ají	Pepper 1	capsicumsp1	Capsicum baccatum	Icons made by <a href="https://www.flaticon.com/authors/smashicons" title="Smashicons">Smashicons</a> from <a href="https://www.flaticon.com/" title="Flaticon">www.flaticon.com</a>	Sonia Polo
56	Ají	Pepper 1	capsicumsp1	Capsicum frutescens	Icons made by <a href="https://www.flaticon.com/authors/smashicons" title="Smashicons">Smashicons</a> from <a href="https://www.flaticon.com/" title="Flaticon">www.flaticon.com</a>	Sonia Polo
56	Ají	Pepper 1	capsicumsp1	Capsicum praetermissum	Icons made by <a href="https://www.flaticon.com/authors/smashicons" title="Smashicons">Smashicons</a> from <a href="https://www.flaticon.com/" title="Flaticon">www.flaticon.com</a>	Sonia Polo
57	Ají	Pepper 2	capsicumsp2	Capsicum annuum	Icons made by <a href="https://www.flaticon.com/authors/smashicons" title="Smashicons">Smashicons</a> from <a href="https://www.flaticon.com/" title="Flaticon">www.flaticon.com</a>	Xiomara Sarmiento
57	Ají	Pepper 2	capsicumsp2	Capsicum chinense	Icons made by <a href="https://www.flaticon.com/authors/smashicons" title="Smashicons">Smashicons</a> from <a href="https://www.flaticon.com/" title="Flaticon">www.flaticon.com</a>	Xiomara Sarmiento
57	Ají	Pepper 2	capsicumsp2	Capsicum pubescens	Icons made by <a href="https://www.flaticon.com/authors/smashicons" title="Smashicons">Smashicons</a> from <a href="https://www.flaticon.com/" title="Flaticon">www.flaticon.com</a>	Xiomara Sarmiento
58	Arracacha	Peruvian parsnip	arracaciaxanthorrhiza	Arracacia xanthorrhiza	Xiomara Sarmiento	Xiomara Sarmiento
59	Guandul	Pigeon pea	cajanuscajan	Cajanus cajan	Xiomara Sarmiento	Xiomara Sarmiento
60	Piña	Pinneapple	ananascomosus	Ananas comosus	Icons made by <a href="https://www.flaticon.com/authors/freepik" title="Freepik">Freepik</a> from <a href="https://www.flaticon.com/" title="Flaticon">www.flaticon.com</a>	Sonia Polo
61	Papa	Potato 1	solanumtuberosum	Solanum tuberosum	Icons made by <a href="https://www.flaticon.com/authors/freepik" title="Freepik">Freepik</a> from <a href="https://www.flaticon.com/" title="Flaticon">www.flaticon.com</a>	Xiomara Sarmiento
62	Papa	Potato 2	solanumsppotato1	Solanum andreanum	Icons made by <a href="https://www.flaticon.com/authors/freepik" title="Freepik">Freepik</a> from <a href="https://www.flaticon.com/" title="Flaticon">www.flaticon.com</a>	Xiomara Sarmiento
62	Papa	Potato 2	solanumsppotato1	Solanum candolleanum	Icons made by <a href="https://www.flaticon.com/authors/freepik" title="Freepik">Freepik</a> from <a href="https://www.flaticon.com/" title="Flaticon">www.flaticon.com</a>	Xiomara Sarmiento
62	Papa	Potato 2	solanumsppotato1	Solanum chrenhkigii	Icons made by <a href="https://www.flaticon.com/authors/freepik" title="Freepik">Freepik</a> from <a href="https://www.flaticon.com/" title="Flaticon">www.flaticon.com</a>	Xiomara Sarmiento
62	Papa	Potato 2	solanumsppotato1	Solanum colombianum	Icons made by <a href="https://www.flaticon.com/authors/freepik" title="Freepik">Freepik</a> from <a href="https://www.flaticon.com/" title="Flaticon">www.flaticon.com</a>	Xiomara Sarmiento
62	Papa	Potato 2	solanumsppotato1	Solanum commersonii	Icons made by <a href="https://www.flaticon.com/authors/freepik" title="Freepik">Freepik</a> from <a href="https://www.flaticon.com/" title="Flaticon">www.flaticon.com</a>	Xiomara Sarmiento
62	Papa	Potato 2	solanumsppotato1	Solanum curtilobum	Icons made by <a href="https://www.flaticon.com/authors/freepik" title="Freepik">Freepik</a> from <a href="https://www.flaticon.com/" title="Flaticon">www.flaticon.com</a>	Xiomara Sarmiento
62	Papa	Potato 2	solanumsppotato1	Solanum depexum* Solanum acaule	Icons made by <a href="https://www.flaticon.com/authors/freepik" title="Freepik">Freepik</a> from <a href="https://www.flaticon.com/" title="Flaticon">www.flaticon.com</a>	Xiomara Sarmiento
62	Papa	Potato 2	solanumsppotato1	Solanum faoensis	Icons made by <a href="https://www.flaticon.com/authors/freepik" title="Freepik">Freepik</a> from <a href="https://www.flaticon.com/" title="Flaticon">www.flaticon.com</a>	Xiomara Sarmiento
62	Papa	Potato 2	solanumsppotato1	Solanum flahaultii	Icons made by <a href="https://www.flaticon.com/authors/freepik" title="Freepik">Freepik</a> from <a href="https://www.flaticon.com/" title="Flaticon">www.flaticon.com</a>	Xiomara Sarmiento
62	Papa	Potato 2	solanumsppotato1	Solanum garcia-barrigae	Icons made by <a href="https://www.flaticon.com/authors/freepik" title="Freepik">Freepik</a> from <a href="https://www.flaticon.com/" title="Flaticon">www.flaticon.com</a>	Xiomara Sarmiento
62	Papa	Potato 2	solanumsppotato1	Solanum juglandifolium	Icons made by <a href="https://www.flaticon.com/authors/freepik" title="Freepik">Freepik</a> from <a href="https://www.flaticon.com/" title="Flaticon">www.flaticon.com</a>	Xiomara Sarmiento
62	Papa	Potato 2	solanumsppotato1	Solanum juzepczukii	Icons made by <a href="https://www.flaticon.com/authors/freepik" title="Freepik">Freepik</a> from <a href="https://www.flaticon.com/" title="Flaticon">www.flaticon.com</a>	Xiomara Sarmiento
62	Papa	Potato 2	solanumsppotato1	Solanum lobianum*Solanum lobbianum	Icons made by <a href="https://www.flaticon.com/authors/freepik" title="Freepik">Freepik</a> from <a href="https://www.flaticon.com/" title="Flaticon">www.flaticon.com</a>	Xiomara Sarmiento
62	Papa	Potato 2	solanumsppotato1	Solanum moscopanum	Icons made by <a href="https://www.flaticon.com/authors/freepik" title="Freepik">Freepik</a> from <a href="https://www.flaticon.com/" title="Flaticon">www.flaticon.com</a>	Xiomara Sarmiento
62	Papa	Potato 2	solanumsppotato1	Solanum parodii*Solanum chacoense	Icons made by <a href="https://www.flaticon.com/authors/freepik" title="Freepik">Freepik</a> from <a href="https://www.flaticon.com/" title="Flaticon">www.flaticon.com</a>	Xiomara Sarmiento
62	Papa	Potato 2	solanumsppotato1	Solanum phureja	Icons made by <a href="https://www.flaticon.com/authors/freepik" title="Freepik">Freepik</a> from <a href="https://www.flaticon.com/" title="Flaticon">www.flaticon.com</a>	Xiomara Sarmiento
62	Papa	Potato 2	solanumsppotato1	Solanum stenotomun*Solanum tuberosum YA ESTA ARRIBA	Icons made by <a href="https://www.flaticon.com/authors/freepik" title="Freepik">Freepik</a> from <a href="https://www.flaticon.com/" title="Flaticon">www.flaticon.com</a>	Xiomara Sarmiento
62	Papa	Potato 2	solanumsppotato1	Solanum tuquerrense*Solanum andreanum	Icons made by <a href="https://www.flaticon.com/authors/freepik" title="Freepik">Freepik</a> from <a href="https://www.flaticon.com/" title="Flaticon">www.flaticon.com</a>	Xiomara Sarmiento
63	Papa	Potato 3	solanumsppotato2	Solanum antipoviczii	Icons made by <a href="https://www.flaticon.com/authors/freepik" title="Freepik">Freepik</a> from <a href="https://www.flaticon.com/" title="Flaticon">www.flaticon.com</a>	Xiomara Sarmiento
63	Papa	Potato 3	solanumsppotato2	Solanum cardiophyllum	Icons made by <a href="https://www.flaticon.com/authors/freepik" title="Freepik">Freepik</a> from <a href="https://www.flaticon.com/" title="Flaticon">www.flaticon.com</a>	Xiomara Sarmiento
63	Papa	Potato 3	solanumsppotato2	Solanum demissum	Icons made by <a href="https://www.flaticon.com/authors/freepik" title="Freepik">Freepik</a> from <a href="https://www.flaticon.com/" title="Flaticon">www.flaticon.com</a>	Xiomara Sarmiento
63	Papa	Potato 3	solanumsppotato2	Solanum jamesii	Icons made by <a href="https://www.flaticon.com/authors/freepik" title="Freepik">Freepik</a> from <a href="https://www.flaticon.com/" title="Flaticon">www.flaticon.com</a>	Xiomara Sarmiento
63	Papa	Potato 3	solanumsppotato2	Solanum malinchense	Icons made by <a href="https://www.flaticon.com/authors/freepik" title="Freepik">Freepik</a> from <a href="https://www.flaticon.com/" title="Flaticon">www.flaticon.com</a>	Xiomara Sarmiento
64	Quinua	Quinoa	Chenopodium quinoa	Chenopodium quinoa	Xiomara Sarmiento	Xiomara Sarmiento
65	Arroz	Rice	Oryza sativa	Oryza sativa	Icons made by <a href="https://www.flaticon.com/authors/xnimrodx" title="xnimrodx">xnimrodx</a> from <a href="https://www.flaticon.com/" title="Flaticon">www.flaticon.com</a>	Xiomara Sarmiento
66	Cebolla larga	Scallion	alliumfistulosum	Allium fistulosum	Icons made by <a href="https://www.flaticon.com/authors/freepik" title="Freepik">Freepik</a> from <a href="https://www.flaticon.com/" title="Flaticon">www.flaticon.com</a>	Sonia Polo
67	Ajonjolí	Sesame	sesamumindicum	Sesamum indicum	Icons made by <a href="https://www.flaticon.com/authors/freepik" title="Freepik">Freepik</a> from <a href="https://www.flaticon.com/" title="Flaticon">www.flaticon.com</a>	Sonia Polo
68	Sorgo	Sorghum	sorghumvulgare	Sorghum vulgare	Xiomara Sarmiento	Xiomara Sarmiento
69	Soya	Soybean	glycinemax	Glycine max	Icons made by <a href="https://www.flaticon.com/authors/freepik" title="Freepik">Freepik</a> from <a href="https://www.flaticon.com/" title="Flaticon">www.flaticon.com</a>	Sonia Polo
70	Caña de azúcar	Sugar cane	saccharumofficinarum	Saccharum officinarum	Icons made by <a href="https://www.flaticon.com/authors/freepik" title="Freepik">Freepik</a> from <a href="https://www.flaticon.com/" title="Flaticon">www.flaticon.com</a>	Sonia Polo
71	Batata	Sweet potato	ipomoeabatatas	Ipomoea batatas	Icons made by <a href="https://www.flaticon.com/authors/freepik" title="Freepik">Freepik</a> from <a href="https://www.flaticon.com/" title="Flaticon">www.flaticon.com</a>	Sonia Polo
72	Tabaco	Tobacco	nicotianatabacum	Nicotiana tabacum	Xiomara Sarmiento	Xiomara Sarmiento
73	Tomate	Tomato	solanumsptomato	Solanum lycopersicum	Icons made by <a href="https://www.flaticon.com/authors/freepik" title="Freepik">Freepik</a> from <a href="https://www.flaticon.com/" title="Flaticon">www.flaticon.com</a>	Sonia Polo
73	Tomate	Tomato	solanumsptomato	Solanum peruvianum	Icons made by <a href="https://www.flaticon.com/authors/freepik" title="Freepik">Freepik</a> from <a href="https://www.flaticon.com/" title="Flaticon">www.flaticon.com</a>	Sonia Polo
73	Tomate	Tomato	solanumsptomato	Solanum pimpinellifolium	Icons made by <a href="https://www.flaticon.com/authors/freepik" title="Freepik">Freepik</a> from <a href="https://www.flaticon.com/" title="Flaticon">www.flaticon.com</a>	Sonia Polo
74	Tomate de árbol	Tree tomato	solanumsptreetomato	Solanum sibundoyense	Xiomara Sarmiento	Xiomara Sarmiento
74	Tomate de árbol	Tree tomato	solanumsptreetomato	Solanum betaceum	Xiomara Sarmiento	Xiomara Sarmiento
74	Tomate de árbol	Tree tomato	solanumsptreetomato	Solanum maternum	Xiomara Sarmiento	Xiomara Sarmiento
74	Tomate de árbol	Tree tomato	solanumsptreetomato	Solanum obliquum	Xiomara Sarmiento	Xiomara Sarmiento
74	Tomate de árbol	Tree tomato	solanumsptreetomato	Solanum unilobum	Xiomara Sarmiento	Xiomara Sarmiento
74	Tomate de árbol	Tree tomato	solanumsptreetomato	Solanum hartwegii	Xiomara Sarmiento	Xiomara Sarmiento
74	Tomate de árbol	Tree tomato	solanumsptreetomato	Solanum amotapense	Xiomara Sarmiento	Xiomara Sarmiento
74	Tomate de árbol	Tree tomato	solanumsptreetomato	Solanum corymbiflorum	Xiomara Sarmiento	Xiomara Sarmiento
74	Tomate de árbol	Tree tomato	solanumsptreetomato	Solanum diversifolium	Xiomara Sarmiento	Xiomara Sarmiento
75	Mortiño	Unripe berries	vacciniummeridionale	Vaccinium meridionale	Xiomara Sarmiento	Xiomara Sarmiento
76	Trigo	Wheat	triticumaestivum	Triticum aestivum	Icons made by <a href="https://www.flaticon.com/authors/vitaly-gorbachev" title="Vitaly Gorbachev">Vitaly Gorbachev</a> from <a href="https://www.flaticon.com/" title="Flaticon">www.flaticon.com</a>	Xiomara Sarmiento
77	Cañaflecha	Wildcane	gyneriumsagittatum	Gynerium sagittatum	Xiomara Sarmiento	Xiomara Sarmiento
78	Yacon	Yacon	smallanthussonchifolius	Smallanthus sonchifolius	Xiomara Sarmiento	Xiomara Sarmiento
79	Ñame	Yam 1	dioscoreatrifida	Dioscorea trifida	Icons made by <a href="https://www.flaticon.com/authors/good-ware" title="Good Ware">Good Ware</a> from <a href="https://www.flaticon.com/" title="Flaticon">www.flaticon.com</a>	Sonia Polo
80	Ñame	Yam 2	dioscoreasp	Dioscorea alata	Icons made by <a href="https://www.flaticon.com/authors/good-ware" title="Good Ware">Good Ware</a> from <a href="https://www.flaticon.com/" title="Flaticon">www.flaticon.com</a>	Xiomara Sarmiento
80	Ñame	Yam 2	dioscoreasp	Dioscorea bulbifera	Icons made by <a href="https://www.flaticon.com/authors/good-ware" title="Good Ware">Good Ware</a> from <a href="https://www.flaticon.com/" title="Flaticon">www.flaticon.com</a>	Xiomara Sarmiento
80	Ñame	Yam 2	dioscoreasp	Dioscorea esculenta	Icons made by <a href="https://www.flaticon.com/authors/good-ware" title="Good Ware">Good Ware</a> from <a href="https://www.flaticon.com/" title="Flaticon">www.flaticon.com</a>	Xiomara Sarmiento
80	Ñame	Yam 2	dioscoreasp	Dioscorea rotundata	Icons made by <a href="https://www.flaticon.com/authors/good-ware" title="Good Ware">Good Ware</a> from <a href="https://www.flaticon.com/" title="Flaticon">www.flaticon.com</a>	Xiomara Sarmiento
